# Supplementary material for: Early changes in laboratory parameters are predictors of mortality and ICU admission in patients with COVID-19: a systematic review and meta-analysis
Source: Springer Nature journal article supplement (doi:10.1007/s00430-020-00696-w), 2020-11-21
Supplement: MOESM1 [file 18610918]

| Study name                                                               | Study design                      | Study site                                                                        | Period of enrolment           | Sample size | Characteristics of participants           | Prevalence of mortality/ICU admission (%) |
|--------------------------------------------------------------------------|-----------------------------------|-----------------------------------------------------------------------------------|-------------------------------|-------------|-------------------------------------------|-------------------------------------------|
| <b>Studies assessing the risk for mortality in all COVID-19 patients</b> |                                   |                                                                                   |                               |             |                                           |                                           |
| Al-Samkari H, Leaf RK                                                    | retrospective cohort              | 5 hospitals in Boston, Massachusetts, USA                                         | 1 March-5 April, 2020         | 252         | n.r.                                      | 11.51                                     |
| Asghar MS, Kazmi, SJH                                                    | retrospective cohort              | Karachi, Pakistan                                                                 | March-April, 2020             | 100         | mean age: 52.58±15.68, 31% female         | 22.00                                     |
| Barman HA, Atici A                                                       | retrospective cohort              | 3 hospitals in Istanbul, Turkey                                                   | 20 March - 20 April, 2020     | 607         | age n.r., 45% female                      | 16.97                                     |
| Bhargava A, Fukushima EA                                                 | retrospective observational study | St John Hospital, Detroit, Michigan, USA                                          | 8 March-8 April, 2020         | 197         | mean age: 60.6±16.2, 47.7% female         | n.r.                                      |
| Bazzan M, Montaruli B                                                    | n.r.                              | Turin, Italy                                                                      | n.r.                          | 88          | age n.r., 31.8% female                    | 10.23                                     |
| Bonetti G, Manelli F                                                     | retrospective cohort              | Emergency Department of the Valcamonica Hospital, Esine, Brescia, Lombardy, Italy | 1 March-30 March, 2020        | 144         | age n.r., 33.3% female                    | 48.61                                     |
| Borobia A, Carcas A                                                      | retrospective cohort              | La Paz University Hospital, Madrid, Spain                                         | 25 February-19 April, 2020    | 2226        | median age 61 (IQR 46-78), 51.8% female   | 20.66                                     |
| Cao J, Tu WJ                                                             | retrospective cohort              | Zhongnan Hospital, Wuhan, China                                                   | 3 January - 1 February, 2020  | 102         | median age 54 (IQR 37-67), 48% female     | 16.7                                      |
| Chen L, Yu J                                                             | retrospective cohort              | 5 hospitals in China                                                              | 20 January- 4 April, 2020     | 1859        | median age 59 (IQR 45-68), 49.76 % female | 11.12                                     |
| Chen R, Liang W                                                          | retrospective cohort              | 575 hospitals in China                                                            | until 31 January, 2020        | 1590        | n.r.                                      | 3.14                                      |
| Chen R, Sang L                                                           | retrospective cohort              | Wuhan, China                                                                      | until 22 March, 2020          | 548         | mean age 56±14.5, 42.9% female            | 18.79                                     |
| Chen X, Zhao B                                                           | retrospective cohort              | General Hospital of Central Theater Command, PLA, China                           | 1 February-19 February, 2020  | 48          | mean age 64.6±18.1, 22.9% female          | 6.25                                      |
| Ciceri F, Castagna A                                                     | retrospective cohort              | San Raffaele Hospital, Milan, Italy                                               | 25 February- 24 March, 2020   | 410         | median age 76 (IQR 67-82) 27.1 % female   | 24.61                                     |
| De Biasi S, Meschiari M                                                  | case-control                      | Infectious Diseases Clinics of the University Hospital in Modena, Italy           | 12 March-30 March, 2020       | 29          | mean age 61.89±14, 17.24% female          | 17.24                                     |
| Fan JL, Wang H                                                           | retrospective cohort              | Zhongnan Hospital of Wuhan University in Wuhan, China                             | 18 January-8 February, 2020   | 21          | mean age 62.5±12.6, 47.7 % female         | 19.05                                     |
| Galloway JB, Norton S                                                    | observational cohort              | King's College Hospital and Princess Royal University Hospital, London, UK        | 1 March- 17 April, 2020       | 1157        | median age: 71 (IQR 57,82), 42.4% female  | 21.10                                     |
| Gan J, Li J                                                              | retrospective case-control        | Tongji Hospital, Wuhan, China                                                     | 6 February - 8 March, 2020    | 95          | median age 65 (IQR 56-76), 39% female     | 41.05                                     |
| Giacomelli A, Ridolfo AL                                                 | prospective cohort                | Luigi Sacco Hospital in Milan, Italy                                              | 21 February-19 March, 2020    | 233         | median age 61 (IQR 50-72), 30.9% female   | 20.60                                     |
| Javanian M, Bayani M                                                     | retrospective cohort              | Ayatollah Rohani, Shahid Beheshti and Yahyanejad hospitals, Babol, Iran           | 25 February- 12 March, 2020   | 100         | mean age 60.12±13.87, 49% female          | 19.00                                     |
| Li D, Chen Y                                                             | retrospective cohort              | West China Hospital, Sichuan University, Chengdu, China                           | 31 January-18 February, 2020  | 163         | n.r.                                      | 16.56                                     |
| Li K, Chen D                                                             | retrospective cohort              | Tongji Hospital, Wuhan, China                                                     | 31 January- 25 March, 2020    | 102         | median age 57 (IQR 45-70), 42% female     | 14.71                                     |
| Li L, Yang L                                                             | retrospective cohort              | Wuhan Union Hospital, Wuhan, China                                                | 1 January- 22 February, 2020  | 93          | mean age 51±17.5, 44% female              | 26.88                                     |
| Li Q, Cao Y                                                              | retrospective cohort              | 7 centers of 5 hospitals in China                                                 | 20 January- 4 April, 2020     | 1449        | median age 57 (IQR 42-66), 49% female     | 8.42                                      |
| Li Y, Peng S                                                             | retrospective cohort              | Thoracic Surgery Department, Tongji                                               | 1 January - 20 February, 2020 | 25          | infected health car staff with a median   | 20.00                                     |

|                                        |                           |                                                                                                    |                                 |      |                                                                                                        |       |
|----------------------------------------|---------------------------|----------------------------------------------------------------------------------------------------|---------------------------------|------|--------------------------------------------------------------------------------------------------------|-------|
|                                        |                           | Hospital, Wuhan, China                                                                             |                                 |      | age of 32 (22-51) and infected hospitalized patients with a median age of 61 (range 51-69); 65% female |       |
| Liu Y, Sun W                           | retrospective cohort      | the Central Hospital of Wuhan, China                                                               | 2 January- 1 March, 2020        | 383  | median age: 46 (IQR (34-61), 57.7% female                                                              | 12.8  |
| Long H, Nie L                          | retrospective cohort      | Tianyou Hospital affiliated to the Wuhan University of Science and Technology, Wuhan, China        | 18 January- 5 March, 2020       | 75   | age n.r., 46.7 % female                                                                                | 30,67 |
| Luo M, Liu J                           | retrospective cohort      | Wuhan Pulmonary Hospital and Tongji Hospital, Huazhong University of Science and Technology, China | 9 January- 31 March, 2020       | 1018 | median age 61 (IQR 49-69), 48.8 % female                                                               | 19.74 |
| Mikami T, Miyashita H                  | retrospective cohort      | 8 hospitals in New York, USA                                                                       | 13 March - 17 April, 2020       | 2820 | age n.r., 42.9% female                                                                                 | 28.58 |
| Omrani-Nava V, Maleki I                | case controll             | Mazandaran University of Medical Sciences, Iran                                                    | February-March, 2020            | 93   | mean age: 56.3±15.2, 45.2% female                                                                      | n.r.  |
| Price-Haywood EG, Burton J             | retrospective cohort      | Ochsner Health, New Orleans, Louisiana, USA                                                        | 1 March-11 April, 2020          | 3481 | age n.r., 60% female                                                                                   | n.r.  |
| Rivera-Izquierdo M, Valero-Ubierna MDC | retrospective case-series | Hospital Universitario, Clinico San Cecilio, Granada, Spain                                        | 16 March-10 April, 2020         | 238  | mean age: 64.7±15.4, 45% female                                                                        | 25.6  |
| Ruan Q, Yang K                         | retrospective cohort      | Jinyintan and Tongji Hospital, Wuhan, China                                                        | n.r.                            | 150  | age n.r., 32% female                                                                                   | 45.3  |
| Salacup G, Bryan K                     | retrospective cohort      | Philadelphia, USA                                                                                  | 1 March- 24 April, 2020         | 244  | median age 66 (IQR 58-76), 49% female                                                                  | 21.31 |
| Satici C, Demirkol MA                  | retrospective cohort      | Gaziosmanpasa Research and Training Hospital, University of Health Sciences, Istanbul, Turkey      | 2 April- 1 May, 2020            | 681  | mean age 56.9±15.7, 49% female                                                                         | 8.08  |
| Shahriarirad R, Khodamoradi Z          | retrospective cohort      | university affiliated hospitals in Shiraz, Iran                                                    | 20 February-20 March, 2020      | 113  | mean age 53.7±16.58, 37.2% female                                                                      | 7.96  |
| Violi F, Cangemi R                     | retrospective cohort      | 5 COVID-19 dedicated centers in Italy                                                              | March-April, 2020               | 319  | age n.r., 39.5% female                                                                                 | 20.06 |
| Wang D, Yin Y                          | retrospective cohort      | Zhongnan Hospital of Wuhan University and Xishui People's Hospital, Wuhan, China                   | until 10 February, 2020         | 107  | median age 51 (IQR 36-65), 46.7% female                                                                | 17.76 |
| Wang K, Zuo P TRAINING COHORT          | prospective cohort        | First People's Hospital of Jiangxia District in Wuhan, China                                       | 7 January-11 February, 2020     | 296  | mean age 47.32 ±14.95, 52.7% female                                                                    | 6.42  |
| Wang K, Zuo P VALIDATION COHORT        | retrospective cohort      | Infection department of Union Hospital in Wuhan, China                                             | 1 January-20 February, 2020     | 44   | mean age 55.2±16.8, 45.5% female                                                                       | 31.82 |
| Xu B, Fan CY                           | retrospective cohort      | Hubei Provincial Hospital of traditional Chinese and Western medicine, Wuhan, China                | 26 December, 2019-1 March, 2020 | 145  | age n.r., 47.6% female                                                                                 | 19.31 |
| Yang H, Yang LC                        | retrospective cohort      | Tongji Hospital, Wuhan, China                                                                      | 29 January.20 March, 2020       | 94   | age n.r., 52% female                                                                                   | 13.83 |
| Yao Q, Wang P                          | retrospective cohort      | Dabieshan Medical Center, Huanggang city, Hubei Province, China                                    | 30 January- 11 February, 2020   | 108  | median age 52 (IQR 37-58), 50.4% female                                                                | 11.11 |
| Ye W, Chen G                           | retrospective cohort      | Wuhan Pulmonary Hospital, Hubei Province, China                                                    | 1 January - 16 March, 2020      | 349  | median age 62 (IQR 21-69), 48% female                                                                  | 14.90 |
| Yu C, Lei Q                            | retrospective cohort      | Tongji Hospital, Wuhan, China                                                                      | 14 January- 28 February, 2020   | 1464 | median age 64 (IQR 51-71) 49.7 % female                                                                | 61.50 |

|                                                                                        |                                   |                                                                                                                                 |                                     |      |                                            |       |
|----------------------------------------------------------------------------------------|-----------------------------------|---------------------------------------------------------------------------------------------------------------------------------|-------------------------------------|------|--------------------------------------------|-------|
| Zhang L, Yan X                                                                         | retrospective cohort              | Wuhan Asia General Hospital, Wuhan, China                                                                                       | 14 January-28 February, 2020        | 1464 | median age: 64 (IQR 51-71), 49.7% female   | 14.48 |
| Zhao L, Zhang YP                                                                       | retrospective cohort              | Tongji Hospital, Wuhan, China                                                                                                   | 9 February-16 February, 2020        | 51   | n.r.                                       | 11.74 |
| Zhao X, Wang K                                                                         | prospective cohort                | First People's Hospital of Jiangxia District, Wuhan, China                                                                      | 7 January-28 February, 2020         | 532  | age n.r., 53.8 % female                    | 54.51 |
| Zhou F, Yu T                                                                           | retrospective cohort              | Jinyintan Hospital and Wuhan Pulmonary Hospital, Wuhan, China                                                                   | 29 December, 2019-31 January, 2020  | 191  | mean age 56 (IQR 46-67), 38% female        | 28.27 |
| <b>Studies assessing the risk for intensive care requirement in all COVID-19 cases</b> |                                   |                                                                                                                                 |                                     |      |                                            |       |
| Aggarwal S, Garcia-Telles N                                                            | retrospective cohort              | Des Moines, Iowa, USA                                                                                                           | 1 March- 4 April, 2020              | 16   | mean age 67 (IQR: 38-95), 25% female       | 50.00 |
| Al-Samkari H, Leaf RK                                                                  | retrospective cohort              | 5 hospitals in Boston, Massachusetts, USA                                                                                       | 1 March-5 April, 2020               | 400  | age n.r., 43% female                       | 36.00 |
| Asghar MS, Kazmi, SJH                                                                  | retrospective cohort              | Karachi, Pakistan                                                                                                               | March-April, 2020                   | 100  | mean age: 52.58±15.68, 31% female          | 33.00 |
| Bhargava A, Fukushima EA                                                               | retrospective observational study | St John Hospital, Detroit, Michigan, USA                                                                                        | 8 March-8 April, 2020               | 197  | mean age: 60.6±16.2, 47.7% female          | 38.07 |
| Burian E, Jungman F                                                                    | retrospective cohort              | Munich, Germany                                                                                                                 | March-April, 2020                   | 65   | mean age: 61.5±17, 35.4% female            | 43.08 |
| Cai SH, Liao W                                                                         | retrospective cohort              | Dongguan People's Hospital, Nanfang hospital and the First Affiliated Hospital of Xiamen University, China                      | 23 January-14 February, 2020        | 96   | age n.r., 43.75% female                    | n.r.  |
| Cecconi M, Piovani D                                                                   | retrospective cohort              | Humanitas Research Hospital, Rozzano, Italy                                                                                     | 22 February- 22 March, 2020         | 239  | mean age: 63.9 ± 14.0, 29.3% female        | 17.15 |
| Chan SSW, Dheepa C                                                                     | retrospective cohort              | Tan Tock Seng Hospital, Singapore                                                                                               | 24 February-28 March, 2020          | 75   | median age 50 (IQR: 30-62), 33.3% female   | 26.67 |
| Chen J, Tangkai Q                                                                      | retrospective cohort              | Shanghai Public Health Clinical Center, Shanghai, China                                                                         | 20 January-6 February, 2020         | 249  | median age:51 (IQR 36-64), 49.4% female    | 8.84  |
| Chen R, Sang L                                                                         | retrospective cohort              | Wuhan, China                                                                                                                    | until 22 March, 2020                | 548  | mean age: 56±14.5, 42.9% female            | 8.76  |
| Cugno M, Meroni PL                                                                     | prospective cohort                | Milan, Italy                                                                                                                    | n.r.                                | 31   | median age: 59 (range 31-85), 32.3% female | 45.16 |
| D'Alessandro M, Cameli P                                                               | prospective cohort                | Siena University Hospital, Italy                                                                                                | n.r.                                | 22   | median age: 63 (IQR: 59-68), 27.3% female  | 54.55 |
| Du RH, Liu LM                                                                          | retrospective observational study | Wuhan Pulmonary Hospital, Tianyou Hospital and Central Hospital of Wuhan, China                                                 | 25 December, 2019-15 February, 2020 | 109  | mean age: 70.7±10.9, 32.1% female          | 46.79 |
| Fan BE, Chong VCL                                                                      | retrospective cohort              | National Centre for Infectious Diseases, Singapore                                                                              | 23 January - 28 February, 2020      | 67   | median age: 42 (IQR: 35-54), 44.8% female  | 13.43 |
| Feng Y, Ling Y                                                                         | retrospective cohort              | Jinyintan Hospital in Wuhan, Shanghai Public Health Clinical Center in Shanghai, and Tongling People's Hospital in Anhui, China | 1 January. 15 February, 2020        | 476  | n.r.                                       | 14.71 |
| Galloway JB, Norton S                                                                  | observational cohort              | King's College Hospital and Princess Royal University Hospital, London, UK                                                      | 1 March- 17 April, 2020             | 1157 | median age: 71 (IQR 57,82), 42.4% female   | 13.57 |
| Goshua G, Pine AB                                                                      | cross-sectional study             | Yale New Haven Hospital, Connecticut, USA                                                                                       | 13 April-24 April, 2020             | 68   | mean age: 62±16, 40% female                | 70.59 |
| Hong KS, Lee KH                                                                        | retrospective cohort              | Yeungnam University Medical Center in Daegu, South Korea                                                                        | in December, 2019                   | 98   | mean age: 55.4±17.1, 61.2% female          | 13.27 |

|                                    |                                  |                                                                                            |                                   |      |                                              |       |
|------------------------------------|----------------------------------|--------------------------------------------------------------------------------------------|-----------------------------------|------|----------------------------------------------|-------|
| Huang C, Wang Y                    | prospective cohort               | Jinyintan Hospital, Wuhan, China                                                           | 16 December, 2019-2 January 2020  | 41   | median age: 49 (IQR: 41-58), 27·0% female    | 31.71 |
| Ihle-Hansen H, Berge T             | n.r.                             | University of Oslo, Norway                                                                 | 3 March-31 March, 2020            | 42   | median age: 72.5 (range 30-95), 33.3% female | 21.23 |
| Israelsen SB, Kristiansen KT       | retrospective case-series        | Hvidovre Hospital, Copenhagen, Denmark                                                     | 10 March-23 April, 2020           | 175  | median age:71 (IQR 55-81), 51.4%             | 15.43 |
| Khamis F, Al-Zakwani I             | retrospective case-series        | Royal Hospital and Al Nahdha Hospital, Oman                                                | 24 February-24 April, 2020        | 63   | mean age: 48±16, 15% female                  | 38.10 |
| Lagi F, Piccica M                  | retrospective cohort             | Infectious and Tropical Disease Unit of the University Hospital, Florence, Tuscany, Italy  | 5 February-26 March, 2020         | 84   | median age: 62 (IQR 51-72), 34.5% female     | 19.05 |
| Li H, Xiang X                      | retrospective cohort             | Tianyou Hospital of Wuhan University of Science and Technology, China                      | 18 January-26 February, 2020      | 132  | mean age: 62.05±12.68, 43.2% female          | 12.12 |
| Liu R, Wang Y                      | retrospective cohort             | Renmin Hospital of Wuhan University, China                                                 | 22 January-25 February, 2020      | 154  | mean age: 64±14, 45.5% female                | 28.57 |
| Liu Y, Yang Y                      | retrospective case-series        | Shenzhen Third People's Hospital, China                                                    | 10 January-20 January, 2020       | 12   | age n.r., 25% female                         | 50.00 |
| McElvaney OJ, McEvoy NL            | n.r.                             | Royal College of Surgeons in Ireland, Dublin, Ireland                                      | n.r.                              | 40   | mean age: 55.5±17.7, 37.5% female            | 50.00 |
| Murk J, Biggelaar R                | retrospective cohort             | Elisabeth-Tweesteden Hospital, the Netherlands                                             | 26 February-20 March, 2020        | 100  | age n.r., 33% female                         | 19.00 |
| Omrani-Nava V, Maleki I            | case controll                    | Mazandaran University of Medical Sciences, Iran                                            | February-March, 2020              | 93   | mean age: 56.3±15.2, 45.2% female            | n.r.  |
| Ortiz-Bizuela E, Villanueva-Reza M | prospective cohort               | 211-bed referral hospital for adults, Mexico City, Mexico                                  | 26 February-23 March, 2020        | 140  | median age: 49 (IQR 39-61.25), 39.3% female  | 20.71 |
| Petrilli CM, Jones SA              | prospective cohort               | NYU Langone Health, New York, USA                                                          | 1 March-8 April, 2020             | 2729 | median age: 63 (IQR 51.74), 38.7% female     | 36.28 |
| Romana PF, Fabio DZ                | retrospective cohort             | Fondazione Policlinico Universitario Agostino Gemelli IRCCS in Rome, Italy                 | 6 March- 16 April, 2020           | 515  | median age: 65 (IQR 53-77), 37.3% female     | 14.95 |
| Suleyman G, Fadel RA               | retrospective case-series        | Henry Ford Health System in metropolitan Detroit, Michigan, USA                            | 9 March-17 March, 2020            | 335  | mean age: 61.4±15.4, 53.5% female            | 42.90 |
| Sun DQ, Wang TY                    | retrospective cohort             | The First Affiliated Hospital of Wenzhou Medical University, China                         | February, 2020                    | 32   | median age: 61 (IQR 54-73), 37.5% female     | 28.13 |
| Urrea JM, Cabrera CM               | retrospective case-control study | University Hospital of Ciudad Real, Spain                                                  | 1 March-15 April, 2020            | 172  | age n.r., 28.3% female                       | 15.70 |
| Wang DW, Hu B                      | retrospective case-series        | Zhongnan Hospital, Wuhan, China                                                            | 1 January- 28 January             | 138  | median age 56 (IQR: 42-68) 45·7 % female     | 26.09 |
| Wang F, Hou H                      | retrospective cohort             | Tongji Hospital, Wuhan, China                                                              | January, 2020                     | 65   | mean age: 57.11±13.03, 43% female            | 23.08 |
| Wang R, Pan M                      | retrospective cohort             | No.2 People's Hospital of Fuyang City, China                                               | 20 January-9 February, 2020       | 125  | mean age: 41.46±15.09, 43.2% female          | 20.00 |
| Wu J, Huang J                      | retrospective cohort             | Wuhan Hankou Hospital and No. 6 Hospital of Wuhan, China                                   | 26 December, 2019- 15 March, 2020 | 2041 | age NA, 58.2% female                         | 34.15 |
| Yang L, Liu J                      | retrospective case-series        | Yichang Central People's Hospital, a designated hospital in Yichang, Hubei Province, China | 30 January-8 February, 2020       | 200  | mean age: 55±17.1, 51% female                | 14.50 |

|                                                                                     |                                  |                                                                                                                              |                                     |      |                                              |       |
|-------------------------------------------------------------------------------------|----------------------------------|------------------------------------------------------------------------------------------------------------------------------|-------------------------------------|------|----------------------------------------------|-------|
| Zeng Z, Ma YAC                                                                      | retrospective cohort             | 5 hospitals in China                                                                                                         | 22 January-14 March, 2020           | 461  | median age: 45 (IQR 34.5-57), 51.48 % female | 11.93 |
| Zhou Y, Fu B                                                                        | n.r.                             | The First Affiliated Hospital of University of Science and Technology, Hefei, Anhui, China                                   | n.r.                                | 33   | age n.r., 33.3% female                       | 36.36 |
| <b>Studies assessing the risk for mortality in critically ill COVID-19 patients</b> |                                  |                                                                                                                              |                                     |      |                                              |       |
| Auld S, Caridi-Scheible M                                                           | retrospective cohort             | 6 COVID-19 designated ICU in 3 hospitals in Atlanta, Georgia, USA                                                            | 6 March-17 April, 2020              | 217  | median age: 64 (IQR: 54-73), 45.2% female    | 29.66 |
| Bhatraju KP, Ghassemieh BJ                                                          | retrospective case-series        | 9 hospitals in the USA                                                                                                       | 24 February-March 9, 2020           | 28   | mean age: 64±18, 37% female                  | 42.86 |
| Borobia A, Carcas A                                                                 | retrospective cohort             | La Paz University Hospital, Madrid, Spain                                                                                    | 25 February-19 April, 2020          | 75   | median age 64 (IQR 54-71), 24% female        | 73.33 |
| Cen Y, Chen X                                                                       | retrospective cohort             | Huoshenshan Hospital, General Hospital of the Central Theatre Command of the PLA, and mobile cabin hospitals in Wuhan, China | from 10 January, 2020               | 65   | age n.r., 50.8% female                       | 66.15 |
| Cummings MJ, Darryl Abrams                                                          | prospective observational cohort | two NewYork-Presbyterian hospitals affiliated with Columbia University Irving Medical Center in northern Manhattan, USA      | 2 March-April 1, 2020               | 1150 | median age: 62 (IQR 51-72), 33% female       | 22.35 |
| Fan H, Zhang L                                                                      | retrospective cohort             | Jinyintan Hospital, Wuhan, China                                                                                             | 30 December, 2019-16 February, 2020 | 73   | mean age: 58.36±14.31, 32.9% female          | 64.38 |
| He XW, Lai JS                                                                       | retrospective cohort             | Tongji Medical College, Huazhong University of Science and Technology, China                                                 | 3 February. 24 February, 2020       | 54   | median age: 68 (IQR 59.8-74.39, 37% female   | 48.15 |
| Huang W, Li C                                                                       | retrospective cohort             | Tongji Hospital, Wuhan, China                                                                                                | 29 January-6 March, 2020            | 615  | age n.r., 38.2% female                       | 37.72 |
| Li J, Li M                                                                          | retrospective cohort             | the Central Hospital of Wuhan, China                                                                                         | 1 January- 20 February, 2020        | 134  | median age: 67 (IQR 56-75), 38.98 % female   | 71.19 |
| Xu J, Yang X                                                                        | retrospective cohort             | Wuhan Union Hospital, Jinyintan Hospital, and Wuhan Third Hospital, China                                                    | 12 January-3 February, 2020         | 239  | mean age: 62.5±13.3, 40.2% female            | 61.51 |
| Zou X, Li S                                                                         | retrospective cohort             | Tongji Hospital, Wuhan, China                                                                                                | 10 January-10 February, 2020        | 154  | mean age: 60.68±13, 56.5% female             | 33.77 |

**Supplementary Table 1: Characteristics of included studies**

In-hospital mortality: all patients were either dead or discharged and no unclosed cases were included. ICU=intensive care unit, SD=standard deviation, IQR=interquartile range, n.r.= not reported

| Study name                                                                     | N <sup>o</sup> of patients in the analysis (N <sup>o</sup> of studies) | Weighted Mean Difference with worse prognosis (95% Confidence Interval) | p-value | I-squared test (p-value) |
|--------------------------------------------------------------------------------|------------------------------------------------------------------------|-------------------------------------------------------------------------|---------|--------------------------|
| <b><u>Mortality in "mixed" population (deceased vs discharged)</u></b>         |                                                                        |                                                                         |         |                          |
| White blood cell × 10 <sup>9</sup> /L                                          | 7743 (20)                                                              | 2.35 (1.96, 2.83)                                                       | p<0.001 | 64.5% (p<0.001)          |
| Lymphocyte × 10 <sup>9</sup> /L                                                | 9780 (17)                                                              | -0.35 (-0.43, -0.27)                                                    | p<0.001 | 94.2% (p<0.001)          |
| CD3+ lymphocyte cell/μL                                                        | 2775 (4)                                                               | -329.71 (-370.82, -288.59)                                              | p<0.001 | 60.1% (p=0.057)          |
| CD4+ lymphocyte cell/μL                                                        | 2775 (4)                                                               | -164.24 (-190.51, -137.97)                                              | p<0.001 | 67.0% (p=0.028)          |
| CD8+ lymphocyte cell/μL                                                        | 2775 (4)                                                               | -115.45 (-130.61, -100.30)                                              | p<0.001 | 55.7% (p=0.080)          |
| Neutrophil granulocyte × 10 <sup>9</sup> /L                                    | 7210 (12)                                                              | 2.67 (2.12, 3.21)                                                       | p<0.001 | 71.7% (p<0.001)          |
| Eosinophil granulocyte × 10 <sup>9</sup> /L                                    | 762 (3)                                                                | -0.02 (-0.03, -0.01)                                                    | p=0.003 | 74.6% (p=0.019)          |
| Monocyte × 10 <sup>9</sup> /L                                                  | 2670 (7)                                                               | -0.05 (-0.08, -0.03)                                                    | p<0.001 | 0.0% (p=0.583)           |
| Platelet × 10 <sup>9</sup> /L                                                  | 9570 (20)                                                              | -25.66 (-35.56, -15.76)                                                 | p<0.001 | 81.8% (p<0.001)          |
| Haemoglobin g/L                                                                | 5522 (14)                                                              | -3.69 (-6.51, -0.87)                                                    | p=0.010 | 71.9% (p<0.001)          |
| C-reactive protein mg/L                                                        | 9093 (21)                                                              | 65.65 (43.79, 87.50)                                                    | p<0.001 | 99.4% (p<0.001)          |
| Lactate dehydrogenase (U/L)                                                    | 8314 (16)                                                              | 203.79 (151.86, 255.71)                                                 | p<0.001 | 95.2% (p<0.001)          |
| Procalcitonin ng/mL                                                            | 9900 (12)                                                              | 0.38 (0.30, 0.47)                                                       | p<0.001 | 91.8% (p<0.001)          |
| Fibrinogen g/L                                                                 | 6476 (7)                                                               | 0.32 (0.13, 0.50)                                                       | p=0.001 | 52.1% (p=0.051)          |
| D-dimer mg/L                                                                   | 12540 (22)                                                             | 1.31 (1.05, 1.57)                                                       | p<0.001 | 84.5% (p<0.001)          |
| Ferritin μg/L                                                                  | 8274 (11)                                                              | 550.20 (347.97, 752.43)                                                 | p<0.001 | 15.8% (p=0.305)          |
| Creatine kinase (U/L)                                                          | 5047 (9)                                                               | 77.59 (55.31, 99.86)                                                    | p<0.001 | 81.4% (p<0.001)          |
| Interleukin-1 pg/mL                                                            | 1116 (3)                                                               | 0.27 (-0.14, 0.67)                                                      | p=0.197 | 95.1% (p<0.001)          |
| Interleukin-6 pg/mL                                                            | 7023 (8)                                                               | 84.26 (49.23, 119.30)                                                   | p<0.001 | 97.5% (p<0.001)          |
| <b><u>Mortality among critically ill patients (deceased vs discharged)</u></b> |                                                                        |                                                                         |         |                          |
| White blood cell × 10 <sup>9</sup> /L                                          | 326 (3)                                                                | -0.27 (-1.64, 1.10)                                                     | p=0.697 | 19.9% (p=0.287)          |
| Lymphocyte × 10 <sup>9</sup> /L                                                | 403 (4)                                                                | -0.12 (-0.28, 0.03)                                                     | p=0.119 | 75.5% (p=0.007)          |
| Platelet × 10 <sup>9</sup> /L                                                  | 401 (4)                                                                | -30.19 (-44.88, -15.50)                                                 | p<0.001 | 0.0% (p=0.896)           |
| C-reactive protein mg/L                                                        | 423 (4)                                                                | 45.36 (23.50, 67.21)                                                    | p<0.001 | 35.3% (p=0.200)          |
| Lactate dehydrogenase (U/L)                                                    | 189 (3)                                                                | 129.34 (67.73, 190.94)                                                  | p<0.001 | 34.1% (p=0.219)          |
| Procalcitonin ng/mL                                                            | 124 (3)                                                                | 0.13 (-0.23, 0.48)                                                      | p=0.479 | 88.9% (p<0.001)          |
| D-dimer mg/L                                                                   | 411 (4)                                                                | 1.69 (-0.61, 3.99)                                                      | p=0.149 | 85.5% (p<0.001)          |
| <b><u>Intensive care requirement (ICU vs non-ICU)</u></b>                      |                                                                        |                                                                         |         |                          |
| White blood cell × 10 <sup>9</sup> /L                                          | 5130 (22)                                                              | 1.53 (1.04, 2.02)                                                       | p<0.001 | 68.8% (p<0.001)          |
| Lymphocyte × 10 <sup>9</sup> /L                                                | 8063 (23)                                                              | -0.30 (-0.37, -0.23)                                                    | p<0.001 | 87.0% (p<0.001)          |
| CD3+ lymphocyte cell/μL                                                        | 269 (3)                                                                | -322.56 (-589, -55.54)                                                  | p=0.018 | 83.5% (p=0.002)          |
| CD4+ lymphocyte cell/μL                                                        | 302 (4)                                                                | -142.98 (-242.12, -43.85)                                               | p=0.005 | 82.2% (p=0.001)          |
| CD8+ lymphocyte cell/μL                                                        | 302 (4)                                                                | -186.52 (-254.84, -118.21)                                              | p<0.001 | 74.3% (p=0.009)          |
| Neutrophil × 10 <sup>9</sup> /L                                                | 2357 (18)                                                              | 2.47 (1.71, 3.23)                                                       | p=0.037 | 75.2% (p<0.001)          |
| Monocyte × 10 <sup>9</sup> /L                                                  | 510 (6)                                                                | -0.06 (-0.14, 0.02)                                                     | p=0.146 | 58.7% (p=0.033)          |
| Platelet × 10 <sup>9</sup> /L                                                  | 2606 (21)                                                              | -4.26 (-18.44, 8.87)                                                    | p=0.492 | 66.4% (p<0.001)          |
| Haemoglobin g/L                                                                | 1647 (14)                                                              | -7.39 (-11.65, -3.14)                                                   | p=0.001 | 64.1% (p=0.001)          |
| C-reactive protein mg/L                                                        | 4402 (17)                                                              | 68.51 (53.19, 83.83)                                                    | p<0.001 | 79.8% (p<0.001)          |
| Lactate dehydrogenase (U/L)                                                    | 2425 (16)                                                              | 190.91 (129.40, 252.42)                                                 | p<0.001 | 90.4% (p<0.001)          |
| Procalcitonin ng/mL                                                            | 3763 (8)                                                               | 0.21 (0.05, 0.37)                                                       | p=0.008 | 95.6% (p<0.001)          |
| Fibrinogen g/L                                                                 | 695 (3)                                                                | 1.04 (0.66, 1.43)                                                       | p<0.001 | 0.0% (p=0.900)           |
| D-dimer mg/L                                                                   | 3417 (15)                                                              | 0.77 (0.50, 1.04)                                                       | p=0.007 | 81.1% (p<0.001)          |
| Ferritin μg/L                                                                  | 2168 (3)                                                               | 328.28 (181.58, 474.99)                                                 | p<0.001 | 15.8% (p=0.305)          |
| Creatine kinase (U/L)                                                          | 1586 (8)                                                               | 54.07 (28.37, 79.77)                                                    | p<0.001 | 35.2% (p=0.148)          |
| Interleukin-6 pg/mL                                                            | 258 (4)                                                                | 26.67 (15.98, 37.35)                                                    | p<0.001 | 0.0% (p=0.592)           |

**Supplementary Table 2:** Summary for the results of the quantitative synthesis for continuous outcomes.

| Laboratory parameter                                                   | Threshold | N <sup>o</sup> of patients in the analysis (N <sup>o</sup> of studies) | Odds ratio with worse prognosis (95% Confidence Interval) | p-value           | I-squared test (p-value) |
|------------------------------------------------------------------------|-----------|------------------------------------------------------------------------|-----------------------------------------------------------|-------------------|--------------------------|
| <b><u>Mortality in "mixed" population (deceased vs discharged)</u></b> |           |                                                                        |                                                           |                   |                          |
| White blood cell × 10 <sup>9</sup> /L                                  | <3.5      | 191 (2)                                                                | 0.98 (0.24, 4.04)                                         | p=0.976           | 0.0% (p=0.829)           |
|                                                                        | <4.0      | 4609 (7)                                                               | <b>0.38 (0.20, 0.72)</b>                                  | <b>p=0.003</b>    | 40.6% (p=0.120)          |
|                                                                        | >9.5      | 302 (3)                                                                | <b>3.70 (1.72, 7.69)</b>                                  | <b>p=0.001</b>    | 0.0% (p=0.523)           |
|                                                                        | >10.0     | 4747 (7)                                                               | <b>6.25 (2.86, 14.29)</b>                                 | <b>p&lt;0.001</b> | 85.2 (p<0.001)           |
|                                                                        | >11.0     | 96 (1)                                                                 | <b>6.67 (2.44, 20.0)</b>                                  | <b>p&lt;0.001</b> | -                        |
| Lymphocyte × 10 <sup>9</sup> /L                                        | <0.5      | 28 (1)                                                                 | 14.67 (0.55, 449.11)                                      | p=0.108           | -                        |
|                                                                        | <0.8      | 723 (5)                                                                | <b>3.74 (1.77, 7.92)</b>                                  | <b>p=0.001</b>    | 65.5% (p=0.021)          |
|                                                                        | <1.0      | 28 (1)                                                                 | 0.32 (0.03, 3.38)                                         | p=0.347           | -                        |
|                                                                        | <1.1      | 2107 (4)                                                               | 1.79 (0.41, 7.88)                                         | p=0.442           | 88.4% (p<0.001)          |
|                                                                        | <1.5      | 1341 (3)                                                               | 2.18 (0.28, 16.76)                                        | p=0.456           | 71.8% (p=0.029)          |
| Platelet × 10 <sup>9</sup> /L                                          | <100      | 328 (3)                                                                | 3.42 (0.40, 29.38)                                        | p=0.262           | 63.7% (p=0.064)          |
|                                                                        | <125      | 630 (3)                                                                | <b>8.10 (3.54, 18.54)</b>                                 | <b>p&lt;0.001</b> | 32.7% (p=0.227)          |
|                                                                        | <150      | 1644 (5)                                                               | 1.07 (0.66, 1.74)                                         | p=0.770           | 0.0% (p=0.680)           |
|                                                                        | >400      | 204 (2)                                                                | 3.37 (0.12, 91.10)                                        | p=0.471           | 70.5% (p=0.066)          |
|                                                                        | >450      | 113 (1)                                                                | 1.06 (0.12, 9.26)                                         | p=0.960           | -                        |
| C-reactive protein mg/L                                                | >3.0      | 102 (1)                                                                | 7.15 (0.41, 125.74)                                       | p=0.179           | -                        |
|                                                                        | >5.0      | 528 (2)                                                                | 6.25 (0.07, 592.58)                                       | p=0.430           | 77.2 (p=0.036)           |
|                                                                        | >8.0      | 146 (2)                                                                | 0.41 (0.11, 1.58)                                         | p=0.195           | 0.0% (p=0.452)           |
|                                                                        | >10.0     | 1823 (4)                                                               | <b>4.84 (1.49, 15.67)</b>                                 | <b>p=0.009</b>    | 45.8% (p=0.137)          |
|                                                                        | >50.0     | 375 (3)                                                                | 1.34 (0.36, 5.02)                                         | p=0.667           | 48.3% (p=0.145)          |
|                                                                        | >100      | 514 (3)                                                                | <b>2.49 (1.42, 4.35)</b>                                  | <b>p=0.001</b>    | 14.7% (p=0.310)          |
|                                                                        | >150      | 1001 (2)                                                               | <b>2.92 (2.22, 3.84)</b>                                  | <b>p&lt;0.001</b> | 0.0% (p=0.826)           |
| Lactate dehydrogenase (U/L)                                            | >214      | 3014 (2)                                                               | 2.74 (0.14, 53.68)                                        | p=0.506           | 77.1% (p=0.036)          |
|                                                                        | >245      | 141 (1)                                                                | <b>22.59 (2.96, 172.16)</b>                               | <b>p=0.003</b>    | -                        |
|                                                                        | >250      | 763 (3)                                                                | <b>10.88 (4.48, 26.39)</b>                                | <b>p&lt;0.001</b> | 0.0% (p=0.705)           |
|                                                                        | >350      | 27 (1)                                                                 | 0.07 (0.001, 1.91)                                        | p=0.114           | -                        |
|                                                                        | >440      | 1492 (2)                                                               | 1.56 (0.48, 5.13)                                         | p=0.460           | 32.1% (p=0.225)          |
|                                                                        | >445      | 561 (2)                                                                | 2.59 (0.12, 57.11)                                        | p=0.548           | 81.7% (p=0.019)          |
|                                                                        | >445      | 561 (2)                                                                | 2.59 (0.12, 57.11)                                        | p=0.548           | 81.7% (p=0.019)          |
| Procalcitonin ng/mL                                                    | >0.05     | 4167 (3)                                                               | 10.38 (0.26, 411.70)                                      | p=0.213           | 96.0% (p<0.001)          |
|                                                                        | >0.10     | 164 (1)                                                                | <b>9.09 (4.17, 20.00)</b>                                 | <b>p&lt;0.001</b> | -                        |
|                                                                        | >0.25     | 164 (1)                                                                | <b>12.50 (3.85, 33.33)</b>                                | <b>p&lt;0.001</b> | -                        |
|                                                                        | >0.50     | 1392 (4)                                                               | <b>11.97 (4.75, 30.16)</b>                                | <b>p&lt;0.001</b> | 59.4% (p=0.061)          |
| D-dimer mg/L                                                           | >0.50     | 2920 (8)                                                               | <b>4.30 (1.55, 11.98)</b>                                 | <b>p=0.005</b>    | 83.7% (p<0.001)          |
|                                                                        | >0.55     | 77 (1)                                                                 | <b>9.77 (3.05, 31.33)</b>                                 | <b>p&lt;0.001</b> | -                        |
|                                                                        | >1.0      | 895 (6)                                                                | <b>6.63 (3.62, 12.14)</b>                                 | <b>p&lt;0.001</b> | 45.1% (p=0.105)          |
|                                                                        | >1.11     | 85 (1)                                                                 | <b>4.07 (1.42, 11.67)</b>                                 | <b>p=0.009</b>    | -                        |
|                                                                        | >2.0      | 1983 (2)                                                               | 6.82 (0.77, 60.36)                                        | p=0.084           | 66.1% (p=0.086)          |
|                                                                        | >2.5      | 280 (2)                                                                | 8.77 (0.28, 270.16)                                       | p=0.214           | 78.8% (p=0.030)          |
|                                                                        | >3.0      | 116 (2)                                                                | <b>18.09 (4.63, 70.69)</b>                                | <b>p&lt;0.001</b> | 0.0% (p=0.330)           |
|                                                                        | >3.0      | 116 (2)                                                                | <b>18.09 (4.63, 70.69)</b>                                | <b>p&lt;0.001</b> | 0.0% (p=0.330)           |
| Creatine kinase (U/L)                                                  | >185      | 428 (3)                                                                | <b>3.14 (1.87, 5.27)</b>                                  | <b>p&lt;0.001</b> | 0.0% (p=0.458)           |
|                                                                        | >190      | 135 (2)                                                                | 1.48 (0.47, 4.68)                                         | p=0.506           | 0.0% (p=0.774)           |
| <b><u>Intensive care requirement (ICU vs non-ICU)</u></b>              |           |                                                                        |                                                           |                   |                          |
| White blood cell × 10 <sup>9</sup> /L                                  | <3.5      | 460 (4)                                                                | <b>0.42 (0.18, 0.96)</b>                                  | <b>p=0.039</b>    | 0.0% (p=0.501)           |
|                                                                        | <4.0      | 963 (7)                                                                | 0.71 (0.37, 1.39)                                         | p=0.323           | 32.9% (p=0.177)          |
|                                                                        | >9.5      | 482 (5)                                                                | <b>4.53 (1.95, 10.52)</b>                                 | <b>p&lt;0.001</b> | 26.8% (p=0.243)          |

|                                             |       |          |                                |                   |                    |
|---------------------------------------------|-------|----------|--------------------------------|-------------------|--------------------|
|                                             | >10.0 | 725 (4)  | <b>2.64 (1.22, 5.71)</b>       | <b>p=0.014</b>    | 61.3% (p=0.051)    |
|                                             | >11.0 | 96 (1)   | <b>5.67 (2.21, 14.59)</b>      | <b>p&lt;0.001</b> | -                  |
| Lymphocyte × 10 <sup>9</sup> /L             | <0.4  | 100 (1)  | 0.59 (0.07, 5.08)              | p=0.629           | -                  |
|                                             | <0.6  | 100 (1)  | 1.08 (0.32, 3.95)              | p=0.899           | -                  |
|                                             | <0.8  | 100 (1)  | 1.39 (0.49, 3.95)              | p=0.542           | -                  |
|                                             | <1.0  | 831 (5)  | <b>4.54 (2.58, 7.95)</b>       | <b>p&lt;0.001</b> | 22.3% (p=0.273)    |
|                                             | <1.1  | 1267 (8) | <b>2.64 (1.49, 4.70)</b>       | <b>p=0.001</b>    | 36.4% (p=0.138)    |
|                                             | <1.5  | 100 (1)  | 1.30 (0.47, 3.66)              | p=0.613           | -                  |
|                                             | >3.2  | 315 (4)  | 1.38 (0.29, 6.67)              | p=0.689           | 0.0% (p=0.687)     |
| Neutrophil granulocyte × 10 <sup>9</sup> /L | >6.3  | 186 (3)  | <b>2.32 (1.23, 4.37)</b>       | <b>p=0.009</b>    | 0.0% (p=0.416)     |
|                                             | <1.8  | 109 (1)  | 0.12 (0.01, 2.24)              | p=0.154           | -                  |
|                                             | <1.0  | 67 (1)   | <b>439.40 (19.09, 9658.21)</b> | <b>p&lt;0.001</b> | -                  |
| Platelet × 10 <sup>9</sup> /L               | <100  | 331 (5)  | 1.60 (0.61, 4.19)              | p=0.335           | 28.3% (p=0.233)    |
|                                             | <125  | 926 (5)  | 1.39 (0.80, 2.42)              | p=0.243           | 0.0% (p=0.755)     |
|                                             | <150  | 479 (3)  | 1.05 (0.67, 1.65)              | p=0.840           | 0.0% (0.641)       |
|                                             | >350  | 132 (1)  | 0.34 (0.02, 6.17)              | p=0.468           | -                  |
|                                             | >400  | 158 (2)  | <b>3.63 (1.13, 11.68)</b>      | <b>p=0.031</b>    | 0.0% (p=0.347)     |
| C-reactive protein mg/L                     | >5.0  | 499 (1)  | 16.00 (0.97, 263.34)           | p=0.052           | -                  |
|                                             | >6.0  | 71 (1)   | 0.40 (0.12, 1.36)              | p=0.143           | -                  |
|                                             | >10.0 | 948 (6)  | <b>3.85 (1.21, 12.22)</b>      | <b>p=0.022</b>    | 55.4% (p=0.047)    |
|                                             | >50.0 | 108 (2)  | <b>5.53 (1.45, 21.15)</b>      | <b>p=0.012</b>    | 0.0% (p=0.625)     |
|                                             | >100  | 730 (2)  | <b>6.25 (4.23, 9.23)</b>       | <b>p&lt;0.001</b> | 0.0% (p=0.850)     |
| Lactate dehydrogenase (U/L)                 | >240  | 12 (1)   | 0.28 (0.01, 8.42)              | p=0.465           | -                  |
|                                             | >245  | 40 (1)   | 7.06 (0.79, 62.72)             | p=0.080           | -                  |
|                                             | >248  | 52 (1)   | 6.60 (0.77, 56.37)             | p=0.085           | -                  |
|                                             | >250  | 301 (3)  | <b>9.44 (4.12, 24.02)</b>      | <b>p&lt;0.001</b> | 0.0% (p=0.953)     |
|                                             | >550  | 67 (1)   | <b>8.48 (1.71, 42.13)</b>      | <b>p=0.009</b>    | -                  |
| Procalcitonin ng/mL                         | >0.05 | 517 (4)  | 14.78 (6.06, 36.03)            | p<0.001           | 48.8% (p=0.118)    |
|                                             | >0.10 | 39 (1)   | 3.50 (0.82, 14.93)             | p=0.090           | -                  |
|                                             | >0.12 | 132 (1)  | 3.12 (0.73, 13.23)             | p=0.124           | -                  |
|                                             | >0.25 | 40 (1)   | 4.33 (0.62, 30.25)             | p=0.139           | -                  |
|                                             | >0.50 | 1389 (7) | 1.92 (0.92, 4.00)              | p=0.081           | 57.6% (0.92, 4.00) |
| D-dimer mg/L                                | >0.50 | 837 (5)  | <b>3.37 (1.90, 5.95)</b>       | <b>p&lt;0.001</b> | 0.0% (p=0.780)     |
|                                             | >0.55 | 54 (1)   | <b>6.58 (1.81, 23.96)</b>      | <b>p=0.004</b>    | -                  |
|                                             | >1.00 | 400 (1)  | <b>2.70 (1.75, 4.17)</b>       | <b>p&lt;0.001</b> | -                  |
|                                             | >2.50 | 400 (1)  | 1.26 (0.69, 2.32)              | p=0.454           | -                  |

**Supplementary Table 3:** Summary for the results of the quantitative synthesis for on admission laboratory thresholds



| Study authors and year of publication                                    | Results of the study regarding the association between baseline laboratory parameter and mortality/intensive care requirement                                                                                                                                                                                                                                                                                                                                                                                                                                                                                                                                                                                                                                                                                                                                                                                                                                                                                                                                                                                                                                                                                                                                                                                                                                                                                                                                                                                                |
|--------------------------------------------------------------------------|------------------------------------------------------------------------------------------------------------------------------------------------------------------------------------------------------------------------------------------------------------------------------------------------------------------------------------------------------------------------------------------------------------------------------------------------------------------------------------------------------------------------------------------------------------------------------------------------------------------------------------------------------------------------------------------------------------------------------------------------------------------------------------------------------------------------------------------------------------------------------------------------------------------------------------------------------------------------------------------------------------------------------------------------------------------------------------------------------------------------------------------------------------------------------------------------------------------------------------------------------------------------------------------------------------------------------------------------------------------------------------------------------------------------------------------------------------------------------------------------------------------------------|
| <b>Studies assessing the risk for mortality in all COVID-19 patients</b> |                                                                                                                                                                                                                                                                                                                                                                                                                                                                                                                                                                                                                                                                                                                                                                                                                                                                                                                                                                                                                                                                                                                                                                                                                                                                                                                                                                                                                                                                                                                              |
| Chen X, Zhao B 2020                                                      | Interleukin-6 <100 pg/mL vs ≥100 pg/mL (0/42 vs 3/3 death, respectively; p=0.001)<br><i>(Comment from review authors: This study was excluded from the quantitative synthesis because of the possibility of overlapping with other studies with higher patient number. See “Methods” section of the manuscript.)</i>                                                                                                                                                                                                                                                                                                                                                                                                                                                                                                                                                                                                                                                                                                                                                                                                                                                                                                                                                                                                                                                                                                                                                                                                         |
| Galloway JB, Norton S 2020                                               | Absolute lymphocyte count x10 <sup>9</sup> /L HR=0.46 (95% CI: 0.26, 0.84), p=0.010<br>Absolute neutrophil count x10 <sup>9</sup> /L HR=1.06 (95% CI: 1.02, 1.09), p<0.001<br>C-reactive protein mg/L HR= 1.06 (95% CI: 1.02, 1.09), p<0.001<br><i>(Comment from review authors: HRs were adjusted for age and sex.)</i>                                                                                                                                                                                                                                                                                                                                                                                                                                                                                                                                                                                                                                                                                                                                                                                                                                                                                                                                                                                                                                                                                                                                                                                                     |
| Li L, Yang L 2020                                                        | Total white blood cell count (p=0.201)<br>(survivor: 4.6x10 <sup>9</sup> /L (3.8–5.8); non-survivor 5.2x10 <sup>9</sup> /L (3.9–5.9))<br>Absolute lymphocyte count (p=0.001)<br>(survivor: 1.2x10 <sup>9</sup> /L (0.9–1.6); non-survivor 0.8x10 <sup>9</sup> /L (0.6–1.2))<br>Absolute neutrophil count (p=0.045)<br>(survivor: 2.8x10 <sup>9</sup> /L (2.2–3.6); non-survivor 3.8x10 <sup>9</sup> /L (2.7–5.2))<br>Platelet count (p=0.002)<br>(survivor: 181x10 <sup>9</sup> /L (147–224); non-survivor 136x10 <sup>9</sup> /L (112–173))<br>Haemoglobin (p=0.717)<br>(survivor: 131 g/L (120–146); non-survivor 133 g/L (16.8))<br>Lactate dehydrogenase (p<0.001)<br>(survivor: 204 U/L (173–248); non-survivor 373 U/L (151))<br>Creatine kinase<br>(survivor: 59.5 U/L (40.8–116); non-survivor 186 U/L (124–300))<br>C-reactive protein (p<0.001)<br>(survivor: 7.7 mg/L (3.9–15.7); non-survivor 77 mg/L (44))<br>D-dimer (p=0.064)<br>(survivor: 0.3 mg/L (0.2–0.5); non-survivor 0.6 mg/L (0.3–2.1))<br>Ferritin (p=0.094)<br>(survivor: 489 µg/L (381); non-survivor 810 µg/L (409))<br><i>(Comment from review authors: Values are given in mean (SD) or median (IQR). Haemoglobin, lactate dehydrogenase, and C-reactive protein levels were reported in different measures (median and mean) in the two group. This study was excluded from the quantitative synthesis because of the possibility of overlapping with other studies with higher patient number. See “Methods” section of the manuscript.)</i> |
| Li Y, Peng S 2020                                                        | Absolute lymphocyte count <1.1x10 <sup>9</sup> /L<br>(among survivors 18/20 vs among non-survivors 4/5; p=0.504)<br>Total white blood cell count <4x10 <sup>9</sup> /L<br>(among survivors 11/20 vs among non-survivors 1/5; p=1.000)<br>Total white blood cell count <9.5x10 <sup>9</sup> /L<br>(among survivors 9/20 vs among non-survivors 4/5; p=0.322)<br>Increase of LDH<br>(among survivors 11/20 vs among non-survivors 3/5; p=1.000)<br>Increase of C-reactive protein<br>(among survivors 13/20 vs among non-survivors 3/5; p=1.000)<br>Increase of ferritin<br>(among survivors 7/20 vs among non-survivors 2/5; p=1.000)<br>Increase of D-dimer<br>(among survivors 9/20 vs among non-survivors 2/5; p=1.000)<br><i>(Comment from review authors: Thresholds were not specified for lactate dehydrogenase, C-reactive protein, ferritin, and D-dimer.)</i>                                                                                                                                                                                                                                                                                                                                                                                                                                                                                                                                                                                                                                                       |
| Liu Y, Sun W 2020                                                        | Platelet count <138 x10 <sup>9</sup> /L HR=5.42 (95% CI: 1.89, 15.60) → first quartile<br>Platelet count 138–174 x10 <sup>9</sup> /L HR=2.20 (95% CI: 0.69, 7.02) → second quartile                                                                                                                                                                                                                                                                                                                                                                                                                                                                                                                                                                                                                                                                                                                                                                                                                                                                                                                                                                                                                                                                                                                                                                                                                                                                                                                                          |

|                                                                                           |                                                                                                                                                                                                                                                                                                                                                                                                                                                                                                                                                                                                                                                                                                                          |
|-------------------------------------------------------------------------------------------|--------------------------------------------------------------------------------------------------------------------------------------------------------------------------------------------------------------------------------------------------------------------------------------------------------------------------------------------------------------------------------------------------------------------------------------------------------------------------------------------------------------------------------------------------------------------------------------------------------------------------------------------------------------------------------------------------------------------------|
|                                                                                           | <p>Platelet count 174–213 <math>\times 10^9/L</math> HR=2.29 (95% CI: 0.72, 7.31) → third quartile<br/> Platelet count &gt;213<math>\times 10^9/L</math> HR=0.46 (95% CI: 0.26, 0.84) → fourth quartile<br/> P value trend: &lt;0.001 (estimated using median value of each quartile)<br/> <i>(Comment from review authors: only the first threshold provided significant results.)</i></p>                                                                                                                                                                                                                                                                                                                              |
| Omrani-Nava V, Maleki I 2020                                                              | <p>Lymphopenia OR=7.86 (95% CI: 0.43, 142.74), p=0.163<br/> Thrombocytopenia OR=0.53 (95% CI: 0.04, 6.67), p=0.624<br/> CRP (positive) OR=0.56 (95% CI 0.08, 3.75), p=0.553<br/> <i>(Comment from review authors: data from 93 confirmed COVID-19 patients and 186 healthy controls Normal values reported: absolute lymphocyte count: 1,000-4,000 per <math>mm^3</math>; platelet: 150,000-450,000 per <math>mm^3</math>)</i></p>                                                                                                                                                                                                                                                                                       |
| Price-Haywood EG, Burton J 2020                                                           | <p>Absolute lymphocyte count &lt;1000/<math>\mu L</math> HR=1.33 (95% CI: 1.01, 1.74)<br/> Platelet count &lt;150,000/<math>\mu L</math> HR=1.26 (95% CI: 1.00, 1.60)<br/> Procalcitonin &gt;0.25 ng/mL HR=1.40 (95% CI: 1.06, 1.84)<br/> C-reactive protein &gt;8.2 ng/mL HR=1.01 (95% CI: 0.49, 2.08)<br/> <i>(Comment from review authors: HRs were adjusted for race, age, sex, Charlson Comorbidity Index score, indicators for baseline vital signs and laboratory measures above or below predefined clinical thresholds (respiratory rate; levels of aspartate aminotransferase, venous lactate, creatinine, bilirubin, procalcitonin, and C-reactive protein; and counts of lymphocytes and platelets).</i></p> |
| Rivera-Izquierdo M, Valero-Ubierna MDC 2020                                               | <p>Lymphocytes HR=1.00 (95% CI: 0.99, 1.00)<br/> Neutrophils HR=1.00 (95% CI: 0.99, 1.01)<br/> Haemoglobin HR=1.00 (95% CI: 0.88, 1.13)<br/> D-Dimer HR=1.00 (95% CI: 0.99, 1.00)<br/> Ferritin HR=1.00 (95% CI: 1.00, 1.00)<br/> C-reactive protein HR=1.00 (95% CI: 1.00, 1.00)<br/> Procalcitonin HR=1.04 (95% CI: 1.00, 1.08)<br/> <i>(Comment from review authors: HRs were adjusted for age expressed as increments in the hazard of death per unit increase in the variable. However, these units were not reported.)</i></p>                                                                                                                                                                                     |
| Zhang L, Yan X 2020                                                                       | <p>Total white blood cell count C-index=0.625 (95% CI: 0.571, 0.676)<br/> Absolute lymphocyte count C-index=0.872 (95% CI: 0.832, 0.906)<br/> Absolute neutrophil count C-index=0.773 (95% CI: 0.725, 0.817)<br/> Platelet count C-index=0.781 (95% CI: 0.734, 0.824)<br/> Haemoglobin C-index=0.583 (95% CI: 0.528, 0.635)<br/> D-dimer C-index=0.883 (95% CI: 0.842, 0.916)<br/> <i>(Comment from review authors: Similarly to the AUC, C-index=1 corresponds to the best model prediction, and C-index=0.5 represents a random prediction. Source: <a href="https://square.github.io/pysurvival/metrics/c_index.html">https://square.github.io/pysurvival/metrics/c_index.html</a>; Accessed 30/08/2020)</i></p>      |
| <b>Studies assessing the risk for intensive care requirement in all COVID-19 patients</b> |                                                                                                                                                                                                                                                                                                                                                                                                                                                                                                                                                                                                                                                                                                                          |
| Bhargava A, Fukushima EA 2020                                                             | <p>Leukopenia OR=0.81 (95% CI: 0.31, 2.12), p=0.67<br/> Lymphopenia OR=1.47 (95% CI: 0.82, 2.64), p=0.20<br/> Thrombocytopenia OR=1.17 (95% CI: 0.56, 2.42), p=0.68<br/> Elevated C-reactive protein OR=4.20 (95% CI: 0.51, 34.94), p=0.15<br/> Elevated procalcitonin OR=4.29 (95% CI: 1.41, 12.99), p=0.006<br/> <i>(Comment from review authors: Thresholds were not specified)</i></p>                                                                                                                                                                                                                                                                                                                               |
| Cai SH, Liao W 2020                                                                       | <p>Absolute lymphocyte count OR=0.684 (95% CI: 0.350, 1.338), p=0.267<br/> Absolute neutrophil count OR=0.979 (95% CI: 0.725, 1.322), p=0.889<br/> Platelet count OR=0.997 (95% CI: 0.990, 1.004), p=0.398<br/> Haemoglobin OR=1.006 (95% CI: 0.981, 1.032), p=0.630<br/> Lactate dehydrogenase OR=1.001 (95% CI: 0.994, 1.008), p=0.756<br/> Creatine kinase OR=1.002 (95% CI: 1.000, 1.005), p=0.097</p>                                                                                                                                                                                                                                                                                                               |

|                                                                                        |                                                                                                                                                                                                                                                                                                                                                                                                                                                                                                                                                                       |
|----------------------------------------------------------------------------------------|-----------------------------------------------------------------------------------------------------------------------------------------------------------------------------------------------------------------------------------------------------------------------------------------------------------------------------------------------------------------------------------------------------------------------------------------------------------------------------------------------------------------------------------------------------------------------|
|                                                                                        | <i>(Comment from review authors: Thresholds were not specified. Data of 96 confirmed COVID-19 cases.)</i>                                                                                                                                                                                                                                                                                                                                                                                                                                                             |
| Cecconi M, Piovani D 2020                                                              | Procalcitonin $\geq 0.5$ ng/mL HR=2.86 (95% CI: 1.74, 4.69), p<0.001<br>Interleukin-6 $\geq 200$ pg/mL HR=1.31 (95% CI: 1.00, 1.73), p=0.049<br>Ferritin $\geq 336.2$ ng/mL HR=2.49 (95% CI: 1.23, 5.04), p=0.012<br>C-reactive protein $\geq 5$ mg/dL HR=3.63 (95% CI: 1.90, 6.92), p=0.010<br><i>(Comment from review authors: Univariable Cox PH Model)</i>                                                                                                                                                                                                        |
| Chen J, Tangkai Q 2020                                                                 | Total white blood cell count $\times 10^9/L$ OR=1.28 (95% CI: 1.08, 1.52), p=0.004<br>Absolute lymphocyte count $\times 10^9/L$ OR=0.24 (95% CI: 0.08, 0.75), p=0.010<br>CD4+ lymphocyte count per 100 cells/ $\mu L$ OR=0.45 (95% CI: 0.31, 0.64), p<0.001<br>C-reactive protein mg/L OR=1.04 (95% CI: 1.02, 1.05), p=0.67<br>Lactate dehydrogenase (U/L) OR=1.01 (95% CI: 1.00, 1.02), p<0.001<br><i>(Comment from review authors: Univariate logistic regression referring to increase or decrease of risk for mortality by each unit of the given parameters)</i> |
| Galloway JB, Norton S 2020                                                             | Absolute lymphocyte count $\times 10^9/L$ HR=0.59 (95% CI: 0.30, 1.13), p=0.113<br>Absolute neutrophil count $\times 10^9/L$ HR=1.09 (95% CI: 1.05, 1.13), p<0.001<br>C-reactive protein mg/L HR= 1.05 (95% CI: 1.03, 1.06), p<0.001<br><i>(Comment by review authors: HRs were adjusted for age and sex.)</i>                                                                                                                                                                                                                                                        |
| Omrani-Nava V, Maleki I 2020                                                           | Lymphopenia OR=1.48 (95% CI: 0.23, 9.51), p=0.676<br>Thrombocytopenia OR=1.79 (95% CI: 0.12, 25.65), p=0.667<br>CRP (positive) OR=2.83 (95% CI 0.48, 16.54), p=0.245<br><i>(Comment from review authors: data from 93 confirmed COVID-19 patients and 186 healthy controls.)</i>                                                                                                                                                                                                                                                                                      |
| <b>Studies assessing the risk for mortality among critically ill COVID-19 patients</b> |                                                                                                                                                                                                                                                                                                                                                                                                                                                                                                                                                                       |
| Cummings MJ, Darryl Abrams 2020                                                        | Interleukin-6 pg/mL HR=1.11 (95% CI: 1.02, 1.20) (per decile increase)<br>D-dimer $\mu g/mL$ HR=1.10 (95% CI: 1.01, 1.19) (per decile increase)<br><i>(Comment from review authors: HRs were adjusted to initial severity of the disease.)</i>                                                                                                                                                                                                                                                                                                                        |
| Li J, Li M 2020                                                                        | Platelet count OR=0.998 (95% CI: 0.978, 0.999), p=0.012<br>D-dimer OR=1.112 (95% CI: 0.951, 1.301), p=0.185<br>Lactate dehydrogenase OR=1.004 (95% CI: 1.000, 1.008), p=0.073<br><i>Comment from review authors: ORs were adjusted for age, and cardiovascular disease acute respiratory distress syndrome)</i>                                                                                                                                                                                                                                                       |

**Supplementary Table 4:** Results of studies included in the qualitative synthesis

CI: confidence interval; HR: hazard ratio; IQR: interquartile range OR: odds ratio, SD: standard deviation

**A**

n.a. Not applicable  
 + Low risk  
 ? Moderate risk  
 - High risk

|                          | Study participation | Study attrition | Prognostic factor measurement | Outcome measurement | Study confounding <sup>1</sup> | Statistical analysis reporting <sup>2</sup> | Overall risk of bias | Included in meta-analyses |
|--------------------------|---------------------|-----------------|-------------------------------|---------------------|--------------------------------|---------------------------------------------|----------------------|---------------------------|
| Asghar MS, Kazmi, SJH    | +                   | n.a.            | +                             | +                   | -                              | +                                           | -                    | Yes                       |
| Al-Samkari H, Leaf RK    | +                   | n.a.            | +                             | +                   | -                              | +                                           | -                    | Yes                       |
| Barman HA, Atici A       | +                   | n.a.            | +                             | +                   | ?                              | +                                           | +                    | Yes                       |
| Bazzan M, Montaruli B    | +                   | ?               | +                             | +                   | -                              | +                                           | -                    | Yes                       |
| Bonetti G, Manelli F     | +                   | n.a.            | +                             | +                   | ?                              | +                                           | +                    | Yes                       |
| Borobia A, Carcas A      | +                   | n.a.            | +                             | +                   | -                              | +                                           | -                    | Yes                       |
| Cao J, Tu WJ             | +                   | n.a.            | +                             | +                   | -                              | +                                           | -                    | Yes                       |
| Chen L, Yu J             | +                   | n.a.            | +                             | +                   | ?                              | +                                           | +                    | Yes                       |
| Chen R, Liang W          | +                   | n.a.            | +                             | +                   | ?                              | +                                           | +                    | Yes                       |
| Chen R, Sang L           | +                   | n.a.            | +                             | +                   | ?                              | +                                           | +                    | Yes                       |
| Chen X, Zhao B           | +                   | n.a.            | +                             | +                   | -                              | +                                           | -                    | No                        |
| Ciceri F, Castagna A     | +                   | n.a.            | +                             | +                   | ?                              | +                                           | +                    | Yes                       |
| De Biasi S, Meschiari M  | +                   | n.a.            | +                             | +                   | ?                              | +                                           | +                    | Yes                       |
| Fan JL, Wang H           | +                   | n.a.            | +                             | +                   | ?                              | +                                           | +                    | Yes                       |
| Galloway JB, Norton S    | +                   | n.a.            | +                             | +                   | ?                              | ?                                           | ?                    | No                        |
| Gan J, Li J              | +                   | n.a.            | +                             | +                   | +                              | +                                           | +                    | Yes                       |
| Giacomelli A, Ridolfo AL | +                   | +               | +                             | +                   | -                              | +                                           | -                    | Yes                       |
| Javanian M, Bayani M     | +                   | n.a.            | +                             | +                   | ?                              | +                                           | +                    | Yes                       |
| Li D, Chen Y             | +                   | n.a.            | +                             | +                   | -                              | +                                           | -                    | Yes                       |
| Li K, Chen D             | +                   | n.a.            | +                             | +                   | ?                              | +                                           | +                    | Yes                       |
| Li L, Yang L             | +                   | n.a.            | +                             | +                   | ?                              | +                                           | +                    | No                        |
| Li Q, Cao Y              | +                   | n.a.            | +                             | +                   | -                              | +                                           | -                    | Yes                       |
| Li Y, Peng S             | +                   | n.a.            | ?                             | +                   | ?                              | +                                           | ?                    | No                        |
| Liu Y, Sun W             | +                   | n.a.            | +                             | +                   | ?                              | ?                                           | ?                    | No                        |

|                                        | Study participation | Study attrition | Prognostic factor measurement | Outcome measurement | Study confounding <sup>1</sup> | Statistical analysis reporting <sup>2</sup> | Overall risk of bias | Included in meta-analyses |
|----------------------------------------|---------------------|-----------------|-------------------------------|---------------------|--------------------------------|---------------------------------------------|----------------------|---------------------------|
| Long H, Nie L                          | +                   | n.a.            | +                             | +                   | -                              | +                                           | -                    | Yes                       |
| Luo M, Liu J                           | +                   | n.a.            | +                             | +                   | ?                              | +                                           | +                    | Yes                       |
| Mikami T, Miyashita H                  | +                   | n.a.            | +                             | +                   | ?                              | +                                           | +                    | Yes                       |
| Omrani-Nava V, Maleki I                | +                   | n.a.            | +                             | +                   | -                              | ?                                           | -                    | No                        |
| Price-Haywood EG, Burton J             | +                   | n.a.            | +                             | +                   | ?                              | ?                                           | ?                    | No                        |
| Rivera-Izquierdo M, Valero-Ubierna MDC | +                   | n.a.            | +                             | +                   | ?                              | ?                                           | ?                    | No                        |
| Ruan Q, Yang K                         | +                   | n.a.            | ?                             | +                   | -                              | +                                           | -                    | Yes                       |
| Salacup G, Bryan K                     | +                   | n.a.            | +                             | +                   | +                              | +                                           | +                    | Yes                       |
| Satici C, Demirkol MA                  | +                   | n.a.            | +                             | +                   | +                              | +                                           | +                    | Yes                       |
| Shahriarad R, Khodamoradi Z            | +                   | n.a.            | ?                             | +                   | ?                              | +                                           | ?                    | Yes                       |
| Violi F, Cangemi R                     | +                   | n.a.            | +                             | +                   | ?                              | +                                           | +                    | Yes                       |
| Wang D, Yin Y                          | +                   | n.a.            | +                             | +                   | -                              | +                                           | -                    | Yes                       |
| Wang K, Zuo P (training cohort)        | +                   | +               | +                             | +                   | ?                              | +                                           | +                    | Yes                       |
| Wang K, Zuo P (validation cohort)      | +                   | n.a.            | +                             | +                   | ?                              | +                                           | +                    | Yes                       |
| Xu B, Fan CY                           | +                   | n.a.            | +                             | +                   | ?                              | +                                           | +                    | Yes                       |
| Yang H, Yang LC                        | +                   | n.a.            | +                             | +                   | ?                              | +                                           | +                    | Yes                       |
| Yao Q, Wang P                          | +                   | n.a.            | +                             | +                   | ?                              | +                                           | +                    | Yes                       |
| Ye W, Chen G                           | +                   | n.a.            | +                             | +                   | +                              | +                                           | +                    | Yes                       |
| Yu C, Lei Q                            | +                   | n.a.            | +                             | +                   | +                              | +                                           | +                    | Yes                       |
| Zhang L, Yan X                         | +                   | n.a.            | +                             | +                   | ?                              | ?                                           | ?                    | No                        |
| Zhao L, Zhang YP                       | +                   | n.a.            | +                             | +                   | -                              | +                                           | -                    | Yes                       |
| Zhao X, Wang K                         | +                   | +               | +                             | +                   | ?                              | +                                           | +                    | Yes                       |
| Zhou F, Yu T                           | +                   | n.a.            | +                             | +                   | ?                              | +                                           | +                    | Yes                       |

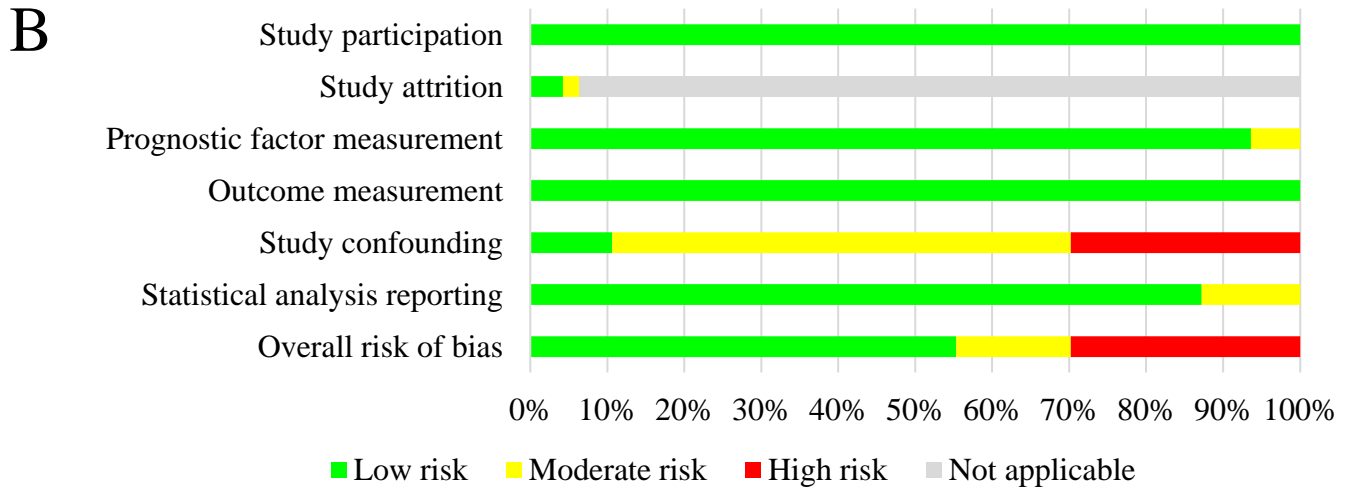

**Supplementary Figure 1:** Risk of bias assessment on study level [A] and across studies [B] deceased and discharged patients with COVID-19

1: Assessed confounding factors are age, hypertension, heart failure and diabetes 2: As we analyzed raw data in the meta-analyses, statistical approaches of individual studies do no imply risk for this domain

# A

- n.a. Not applicable
- + Low risk
- ? Moderate risk
- High risk

|                              | Study participation | Study attrition | Prognostic factor measurement | Outcome measurement | Study confounding <sup>1</sup> | Statistical analysis reporting <sup>2</sup> | Overall risk of bias | Included in meta-analyses |
|------------------------------|---------------------|-----------------|-------------------------------|---------------------|--------------------------------|---------------------------------------------|----------------------|---------------------------|
| Aggarwal S, Garcia-Telles N  | +                   | n.a.            | +                             | ?                   | +                              | +                                           | +                    | Yes                       |
| Al-Samkari H, Leaf RK        | +                   | n.a.            | +                             | ?                   | +                              | +                                           | +                    | Yes                       |
| Asghar MS, Kazmi, SJH        | +                   | n.a.            | +                             | ?                   | ?                              | +                                           | ?                    | Yes                       |
| Bhargava A, Fukushima EA     | +                   | n.a.            | +                             | ?                   | ?                              | ?                                           | -                    | No                        |
| Burian E, Jungman F          | +                   | n.a.            | +                             | ?                   | ?                              | +                                           | ?                    | Yes                       |
| Cai SH, Liao W               | +                   | n.a.            | +                             | ?                   | -                              | ?                                           | -                    | No                        |
| Cecconi M, Piovani D         | +                   | n.a.            | +                             | ?                   | ?                              | ?                                           | -                    | No                        |
| Chan SSW, Dheepa C           | +                   | n.a.            | +                             | ?                   | -                              | +                                           | -                    | Yes                       |
| Chen J, Tangkai Q            | +                   | n.a.            | +                             | ?                   | ?                              | ?                                           | -                    | No                        |
| Chen R, Sang L               | +                   | n.a.            | +                             | ?                   | +                              | +                                           | +                    | Yes                       |
| Cugno M, Meroni PL           | +                   | n.a.            | +                             | ?                   | -                              | +                                           | -                    | Yes                       |
| D'Alessandro M, Cameli P     | +                   | n.a.            | +                             | ?                   | -                              | +                                           | -                    | Yes                       |
| Du RH, Liu LM                | +                   | n.a.            | +                             | ?                   | +                              | +                                           | +                    | Yes                       |
| Fan BE, Chong VCL            | +                   | n.a.            | +                             | ?                   | -                              | +                                           | -                    | Yes                       |
| Feng Y, Ling Y               | +                   | n.a.            | +                             | ?                   | +                              | +                                           | +                    | Yes                       |
| Galloway JB, Norton S        | +                   | n.a.            | +                             | ?                   | ?                              | ?                                           | -                    | No                        |
| Goshua G, Pine AB            | +                   | n.a.            | +                             | ?                   | +                              | +                                           | +                    | Yes                       |
| Hong KS, Lee KH              | +                   | n.a.            | +                             | ?                   | +                              | +                                           | +                    | Yes                       |
| Huang C, Wang Y              | +                   | +               | +                             | ?                   | +                              | +                                           | +                    | Yes                       |
| Ihle-Hansen H, Berge T       | +                   | n.a.            | +                             | ?                   | ?                              | +                                           | ?                    | Yes                       |
| Israelsen SB, Kristiansen KT | +                   | n.a.            | +                             | ?                   | +                              | +                                           | +                    | Yes                       |

|                                     | Study participation | Study attrition | Prognostic factor measurement | Outcome measurement | Study confounding <sup>1</sup> | Statistical analysis reporting <sup>2</sup> | Overall risk of bias | Included in meta-analyses |
|-------------------------------------|---------------------|-----------------|-------------------------------|---------------------|--------------------------------|---------------------------------------------|----------------------|---------------------------|
| Khamis F, Al-Zakwani I              | +                   | n.a.            | +                             | ?                   | +                              | +                                           | +                    | Yes                       |
| Lagi F, Piccica M                   | +                   | n.a.            | +                             | ?                   | ?                              | +                                           | ?                    | Yes                       |
| Li H, Xiang X                       | +                   | n.a.            | +                             | ?                   | -                              | +                                           | -                    | Yes                       |
| Liu R, Wang Y                       | +                   | n.a.            | +                             | ?                   | +                              | +                                           | +                    | Yes                       |
| Liu Y, Yang Y                       | +                   | n.a.            | +                             | ?                   | ?                              | +                                           | ?                    | Yes                       |
| McElvaney OJ, McEvoy NL             | +                   | n.a.            | +                             | ?                   | +                              | +                                           | +                    | Yes                       |
| Murk J, Biggelaar R                 | +                   | n.a.            | +                             | ?                   | +                              | +                                           | +                    | Yes                       |
| Omrani-Nava V, Maleki I             | +                   | n.a.            | +                             | ?                   | ?                              | ?                                           | -                    | No                        |
| Ortiz-Bizuella E, Villanueva-Reza M | +                   | +               | +                             | ?                   | +                              | +                                           | +                    | Yes                       |
| Petrilli CM, Jones SA               | +                   | +               | +                             | ?                   | +                              | +                                           | +                    | Yes                       |
| Romana PF, Fabio DZ                 | +                   | n.a.            | +                             | ?                   | ?                              | +                                           | ?                    | Yes                       |
| Suleyman G, Fadel RA                | +                   | n.a.            | +                             | ?                   | +                              | +                                           | +                    | Yes                       |
| Sun DQ, Wang TY                     | +                   | n.a.            | +                             | ?                   | +                              | +                                           | +                    | Yes                       |
| Urta JM, Cabrera CM                 | +                   | n.a.            | +                             | ?                   | +                              | +                                           | +                    | Yes                       |
| Wang DW, Hu B                       | +                   | n.a.            | +                             | ?                   | -                              | +                                           | -                    | Yes                       |
| Wang F, Hou H                       | +                   | n.a.            | +                             | ?                   | -                              | +                                           | -                    | Yes                       |
| Wang R, Pan M                       | +                   | n.a.            | +                             | ?                   | -                              | +                                           | -                    | Yes                       |
| Wu J, Huang J                       | +                   | n.a.            | +                             | ?                   | +                              | +                                           | +                    | Yes                       |
| Yang L, Liu J                       | +                   | n.a.            | +                             | ?                   | -                              | +                                           | -                    | Yes                       |
| Zeng Z, Ma YAC                      | +                   | n.a.            | +                             | ?                   | -                              | +                                           | -                    | Yes                       |
| Zhou Y, Fu B                        | +                   | n.a.            | +                             | ?                   | -                              | +                                           | -                    | Yes                       |

# B

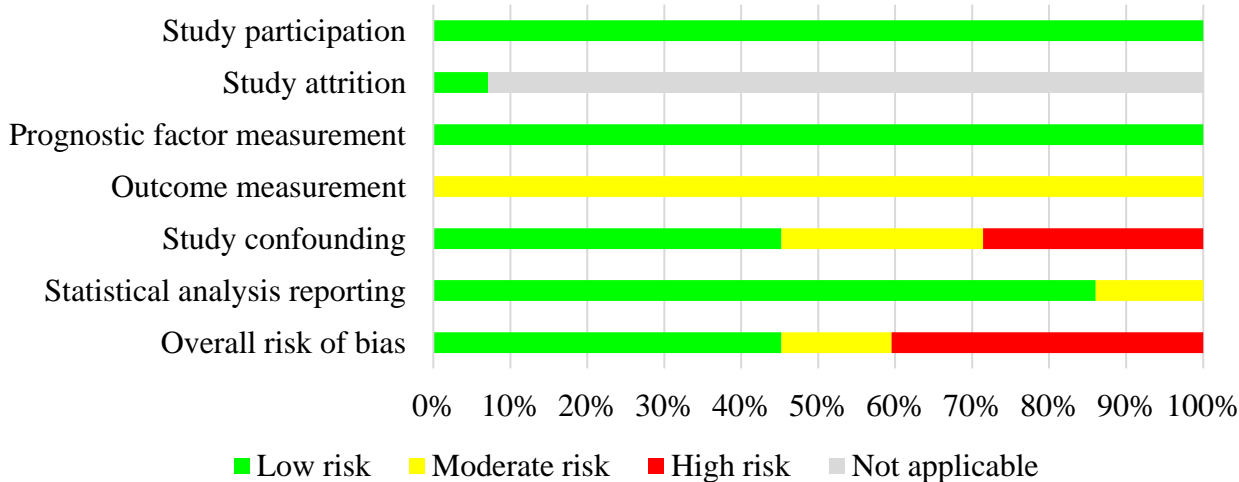

**Supplementary Figure 2:** Risk of bias assessment on study level [A] and across studies [B] comparing patients with and without intensive care requirement

1: Assessed confounding factors are age, hypertension, heart failure and diabetes 2: As we analyzed raw data in the meta-analyses, statistical approaches of individual studies do no imply risk for this domain

# A

n.a. Not applicable

⊕ Low risk

⊙ Moderate risk

⊖ High risk

|                            | Study participation | Study attrition | Prognostic factor measurement | Outcome measurement | Study confounding <sup>1</sup> | Statistical analysis reporting <sup>2</sup> | Overall risk of bias | Included in meta-analyses |
|----------------------------|---------------------|-----------------|-------------------------------|---------------------|--------------------------------|---------------------------------------------|----------------------|---------------------------|
| Auld S, Caridi-Scheible M  | ⊙                   | n.a.            | ⊕                             | ⊕                   | ⊙                              | ⊕                                           | ⊙                    | Yes                       |
| Bhatraju KP, Ghassemieh BJ | ⊙                   | n.a.            | ⊕                             | ⊕                   | ⊙                              | ⊕                                           | ⊙                    | Yes                       |
| Borobia A, Carcas A        | ⊙                   | n.a.            | ⊕                             | ⊕                   | ⊖                              | ⊕                                           | ⊖                    | Yes                       |
| Cen Y, Chen X              | ⊙                   | n.a.            | ⊕                             | ⊕                   | ⊙                              | ⊕                                           | ⊙                    | Yes                       |
| Cummings MJ, Darryl Abrams | ⊙                   | ⊕               | ⊕                             | ⊕                   | ⊙                              | ⊙                                           | ⊖                    | No                        |
| Fan H, Zhang L             | ⊙                   | n.a.            | ⊕                             | ⊕                   | ⊖                              | ⊕                                           | ⊖                    | Yes                       |
| He XW, Lai JS              | ⊙                   | n.a.            | ⊕                             | ⊕                   | ⊙                              | ⊕                                           | ⊙                    | Yes                       |
| Huang W, Li C              | ⊙                   | n.a.            | ⊕                             | ⊕                   | ⊕                              | ⊕                                           | ⊕                    | Yes                       |
| Li J, Li M                 | ⊙                   | n.a.            | ⊕                             | ⊕                   | ⊙                              | ⊙                                           | ⊖                    | No                        |
| Xu J, Yang X               | ⊙                   | n.a.            | ⊕                             | ⊕                   | ⊙                              | ⊕                                           | ⊙                    | Yes                       |
| Zou X, Li S                | ⊙                   | n.a.            | ⊕                             | ⊕                   | ⊖                              | ⊕                                           | ⊖                    | Yes                       |

# B

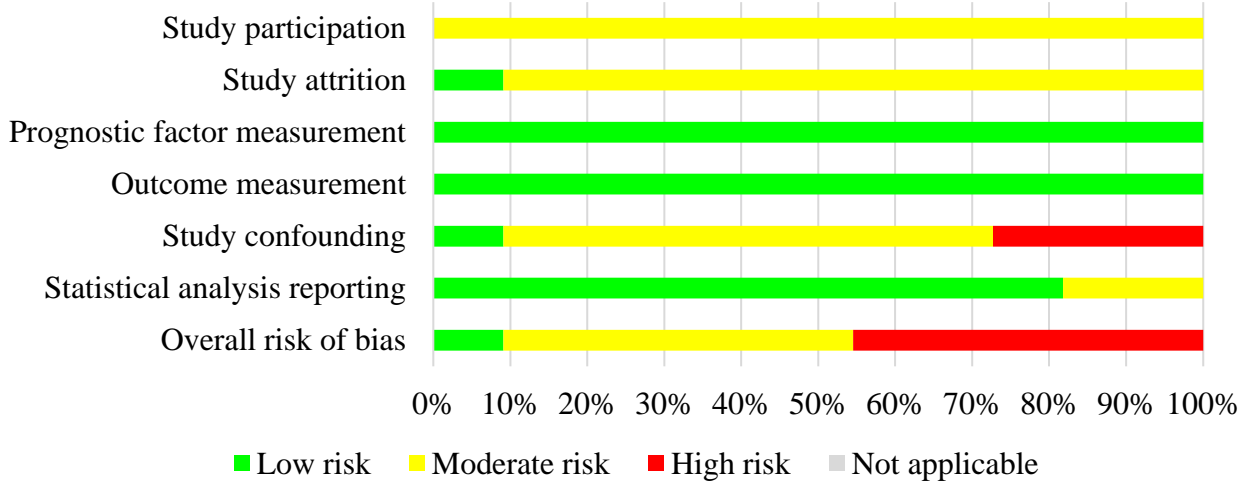

Supplementary Figure 3: Risk of bias assessment on study level [A] and across studies [B] comparing deceased and discharged critically ill patients with COVID-19

1: Assessed confounding factors are age, hypertension, heart failure and diabetes 2: As we analyzed raw data in the meta-analyses, statistical approaches of individual studies do not imply risk for this domain

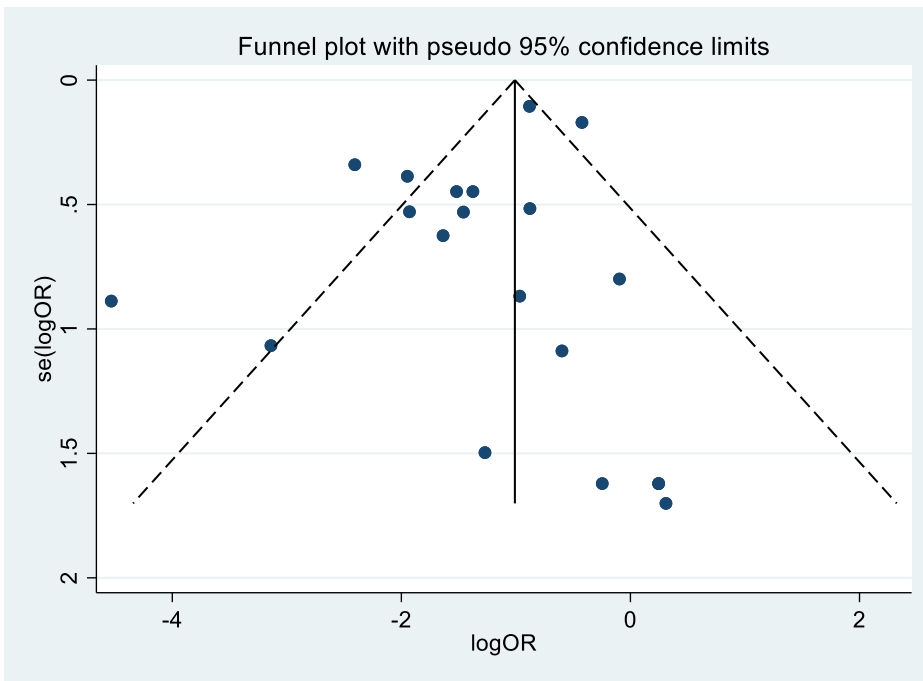

**Supplementary Figure 4:** Funnel plot of the studies reporting on mortality among all COVID-19 patients and baseline total white blood cell count. The visual assessment of the funnel plot and the Egger's test ( $p=0.134$ ) did not indicate asymmetry and therefore small study effect is not likely to be present. Each dot represents a comparison. The y-axis is the standard error of the effect estimate. Larger studies with higher power are placed towards the top and lower powered studies are placed towards the bottom. The x-axis shows the result for the studies expressed in odds ratio.

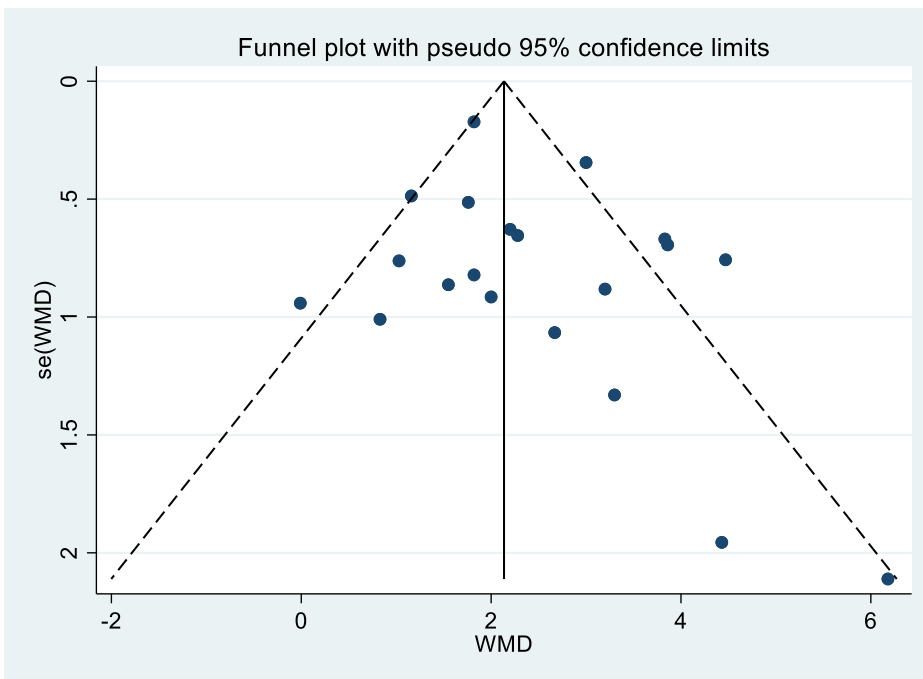

**Supplementary Figure 5:** Funnel plot of the studies reporting on mortality among all COVID-19 patients and baseline total white blood cell count. The visual assessment of the funnel plot and the Egger's test ( $p=0.196$ ) did not indicate asymmetry and therefore small study effect is not likely to be present. Each dot represents a comparison. The y-axis is the standard error of the effect estimate. Larger studies with higher power are placed towards the top and lower powered studies are placed towards the bottom. The x-axis shows the result for the studies expressed in weighted mean difference.

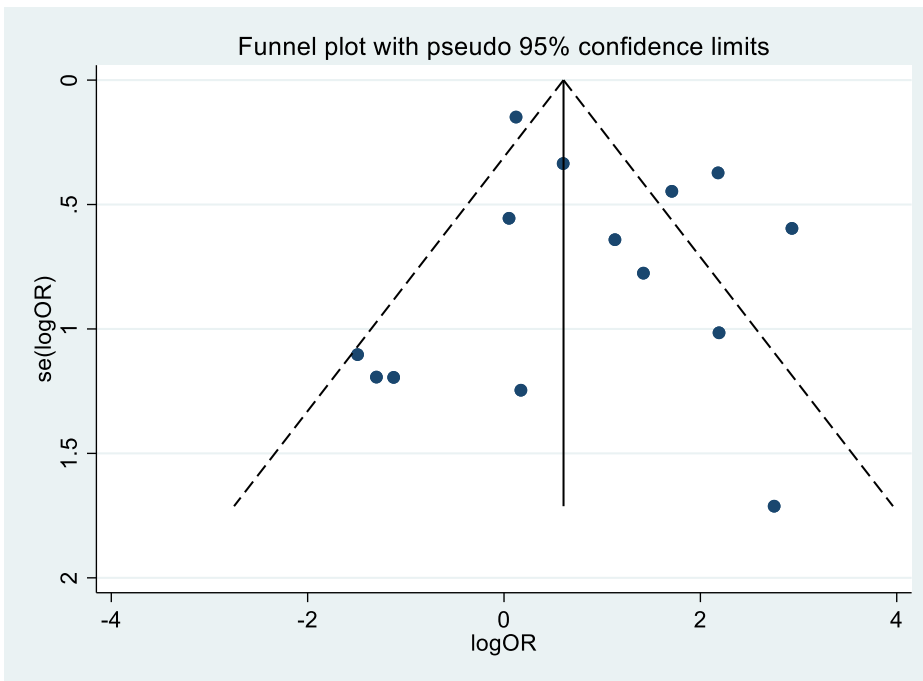

**Supplementary Figure 6:** Funnel plot of the studies reporting on mortality among all COVID-19 patients and baseline absolute lymphocyte count. The visual assessment of the funnel plot and the Egger's test ( $p=0.302$ ) did not indicate asymmetry and therefore small study effect is not likely to be present. Each dot represents a comparison. The y-axis is the standard error of the effect estimate. Larger studies with higher power are placed towards the top and lower powered studies are placed towards the bottom. The x-axis shows the result for the studies expressed in odds ratio.

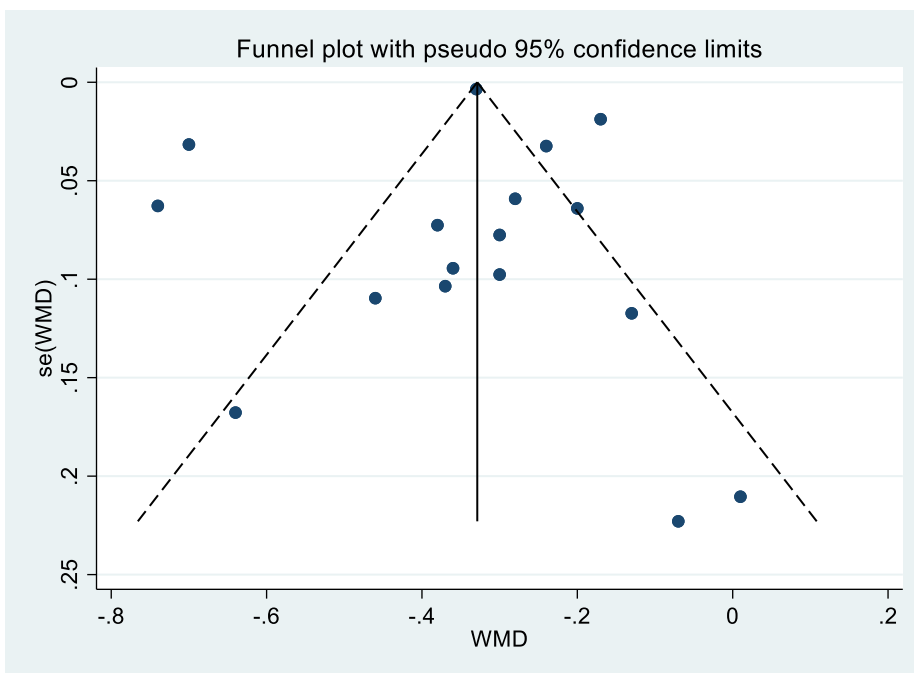

**Supplementary Figure 7:** Funnel plot of the studies reporting on mortality among all COVID-19 patients and baseline absolute lymphocyte count. The visual assessment of the funnel plot and the Egger's test ( $p=0.807$ ) did not indicate asymmetry and therefore small study effect is not likely to be present. Each dot represents a comparison. The y-axis is the standard error of the effect estimate. Larger studies with higher power are placed towards the top and lower powered studies are placed towards the bottom. The x-axis shows the result for the studies expressed in weighted mean difference.



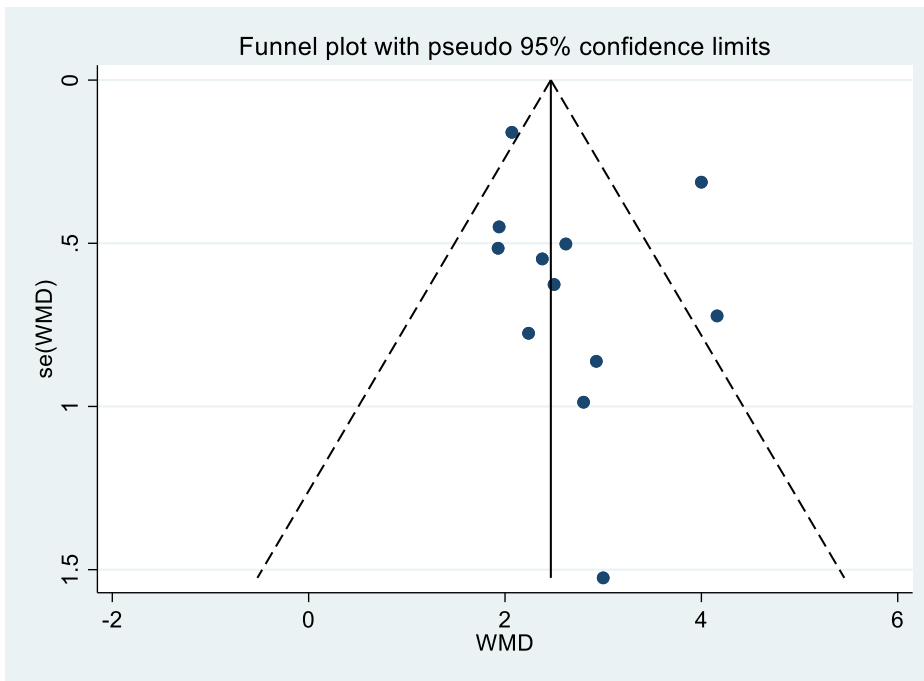

**Supplementary Figure 8:** Funnel plot of the studies reporting on mortality among all COVID-19 patients and baseline absolute neutrophil count. The visual assessment of the funnel plot and the Egger's test ( $p=0.345$ ) did not indicate asymmetry and therefore small study effect is not likely to be present. Each dot represents a comparison. The y-axis is the standard error of the effect estimate. Larger studies with higher power are placed towards the top and lower powered studies are placed towards the bottom. The x-axis shows the result for the studies expressed in weighted mean difference.

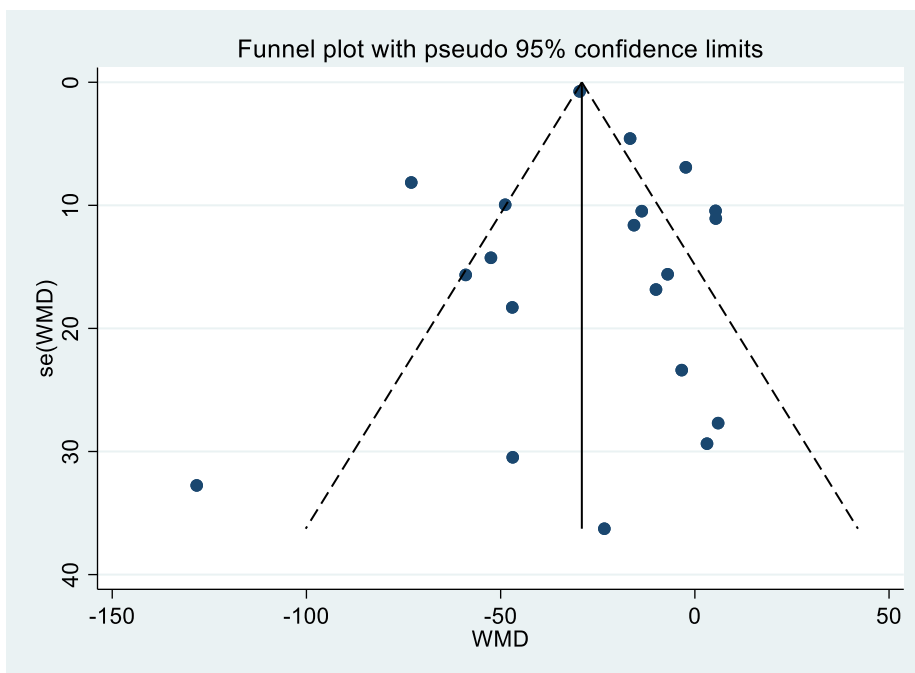

**Supplementary Figure 9:** Funnel plot of the studies reporting on mortality among all COVID-19 patients and baseline platelet count. The visual assessment of the funnel plot and the Egger's test ( $p=0.569$ ) did not indicate asymmetry and therefore small study effect is not likely to be present. Each dot represents a comparison. The y-axis is the standard error of the effect estimate. Larger studies with higher power are placed towards the top and lower powered studies are placed towards the bottom. The x-axis shows the result for the studies expressed in weighted mean difference.

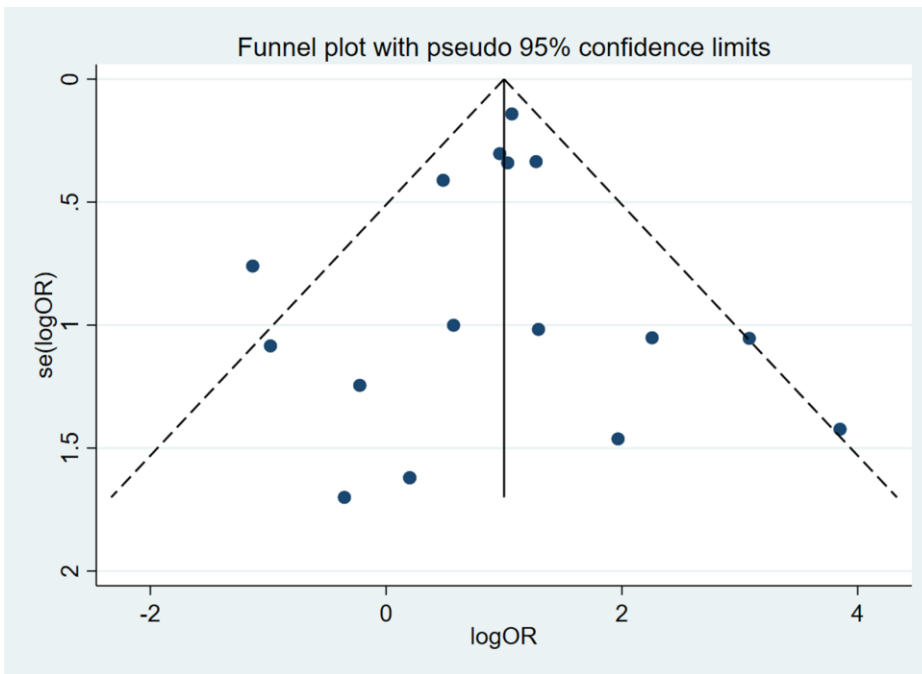

**Supplementary Figure 10:** Funnel plot of the studies reporting on mortality among all COVID-19 patients and baseline C-reactive protein. The visual assessment of the funnel plot and the Egger's test ( $p=0.649$ ) did not indicate asymmetry and therefore small study effect is not likely to be present. Each dot represents a comparison. The y-axis is the standard error of the effect estimate. Larger studies with higher power are placed towards the top and lower powered studies are placed towards the bottom. The x-axis shows the result for the studies expressed in odds ratio.

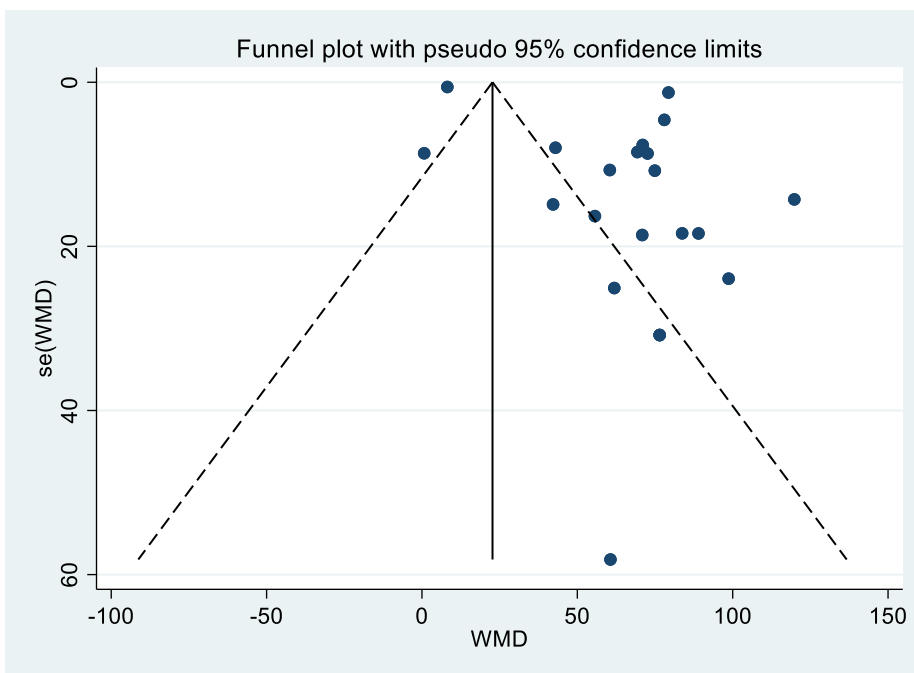

**Supplementary Figure 11:** Funnel plot of the studies reporting on mortality among all COVID-19 patients and C-reactive protein. The visual assessment of the funnel plot and the Egger's test ( $p=0.087$ ) indicate asymmetry and therefore small study effect is likely to be present. Each dot represents a comparison. The y-axis is the standard error of the effect estimate. Larger studies with higher power are placed towards the top and lower powered studies are placed towards the bottom. The x-axis shows the result for the studies expressed in weighted mean difference.

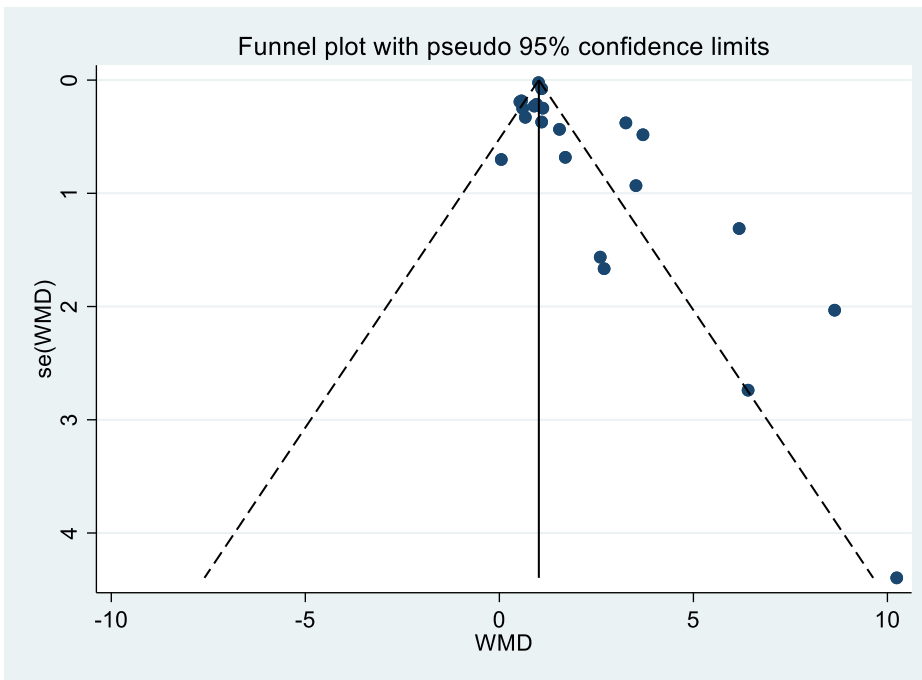

**Supplementary Figure 12:** Funnel plot of the studies reporting on mortality among all COVID-19 patients and baseline D-dimer. The visual assessment of the funnel plot and the Egger's test ( $p=0.037$ ) indicate asymmetry and therefore small study effect is likely to be present. Each dot represents a comparison. The y-axis is the standard error of the effect estimate. Larger studies with higher power are placed towards the top and lower powered studies are placed towards the bottom. The x-axis shows the result for the studies expressed in weighted mean difference.

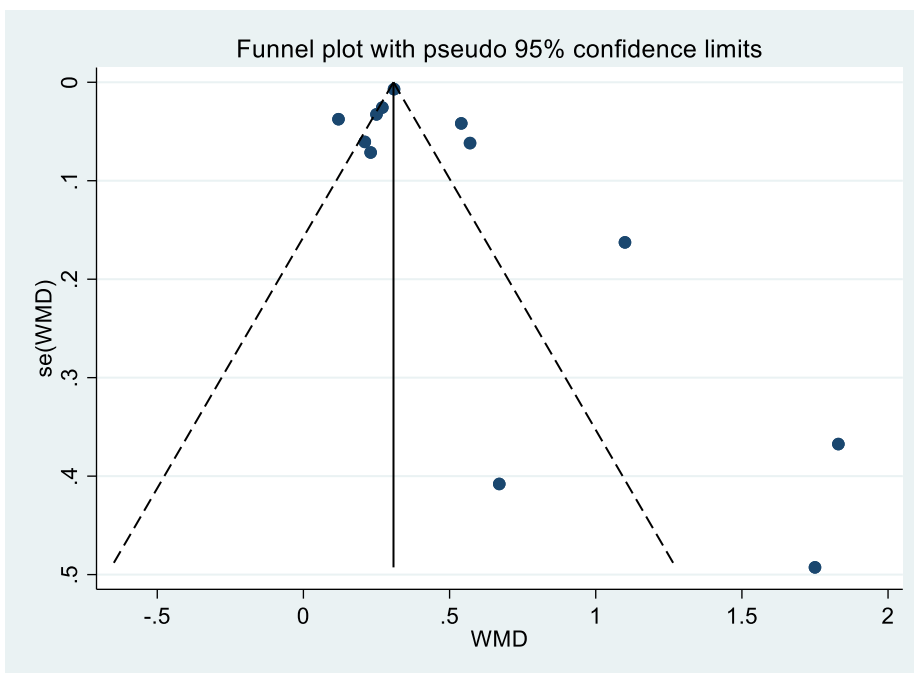

**Supplementary Figure 13:** Funnel plot of the studies reporting on mortality among all COVID-19 patients and baseline D-dimer. The visual assessment of the funnel plot and the Egger's test ( $p=0.005$ ) indicate asymmetry and therefore small study effect is likely to be present. Each dot represents a comparison. The y-axis is the standard error of the effect estimate. Larger studies with higher power are placed towards the top and lower powered studies are placed towards the bottom. The x-axis shows the result for the studies expressed in odds ratio.

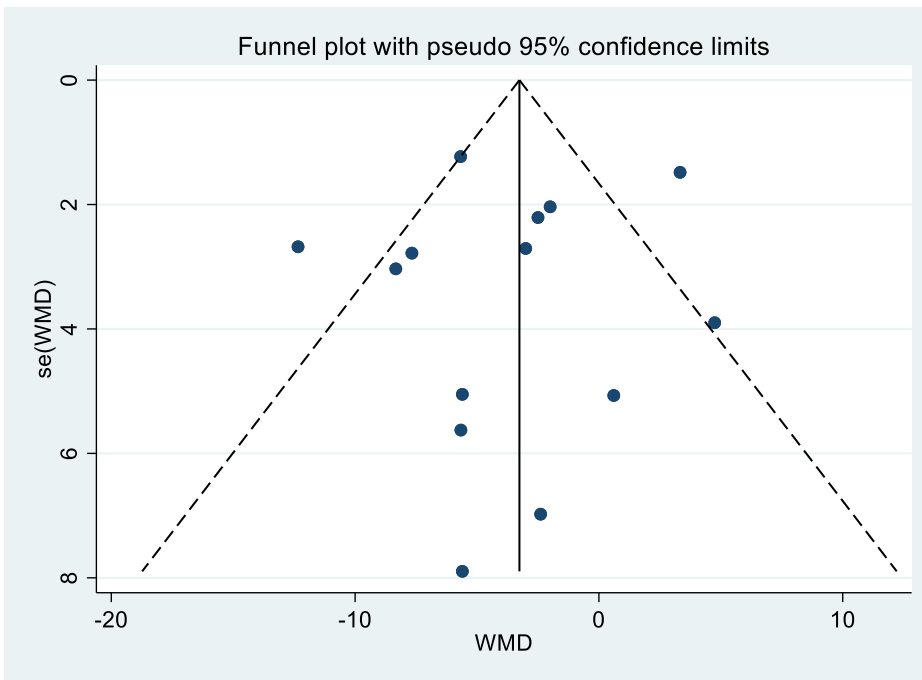

**Supplementary Figure 14:** Funnel plot of the studies reporting on mortality among all COVID-19 patients and baseline haemoglobin. The visual assessment of the funnel plot and the Egger’s test ( $p=0.707$ ) did not indicate asymmetry and therefore small study effect is not likely to be present. Each dot represents a comparison. The y-axis is the standard error of the effect estimate. Larger studies with higher power are placed towards the top and lower powered studies are placed towards the bottom. The x-axis shows the result for the studies expressed in weighted mean difference.

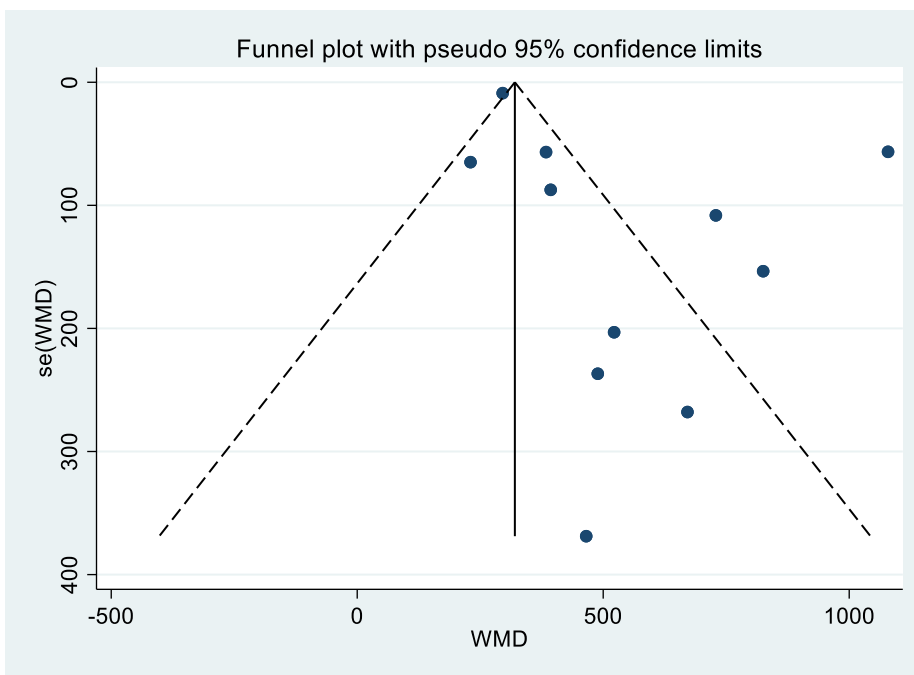

**Supplementary Figure 15:** Funnel plot of the studies reporting on mortality among all COVID-19 patients and baseline ferritin. The visual assessment of the funnel plot and the Egger’s test ( $p=0.103$ ) did not indicate asymmetry and therefore small study effect is not likely to be present. Each dot represents a comparison. The y-axis is the standard error of the effect estimate. Larger studies with higher power are placed towards the top and lower powered studies are placed towards the bottom. The x-axis shows the result for the studies expressed in weighted mean difference.

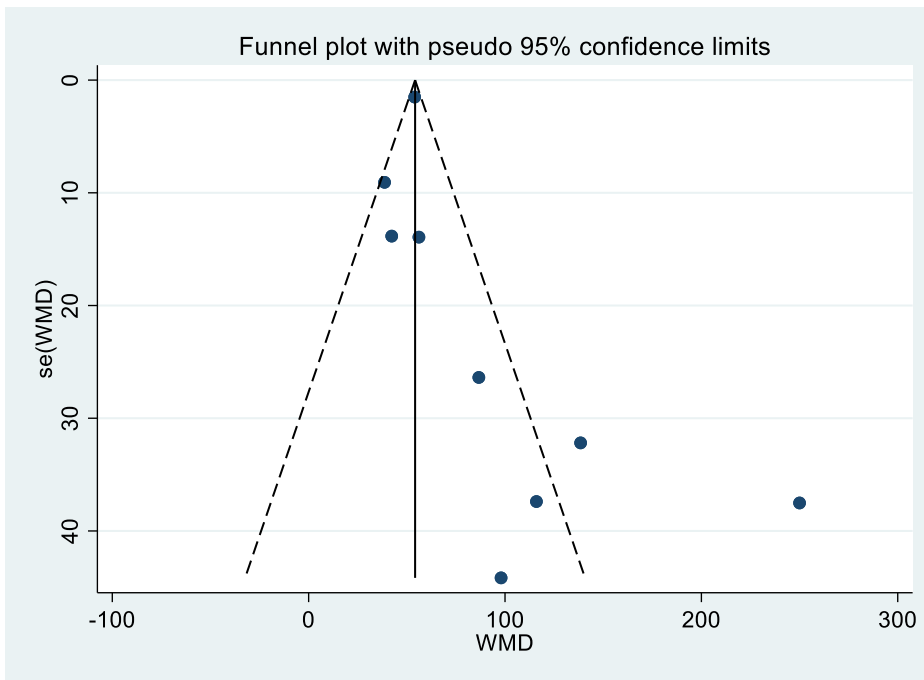

**Supplementary Figure 16:** Funnel plot of the studies reporting on mortality among all COVID-19 patients and creatine kinase. The visual assessment of the funnel plot and the Egger's test ( $p < 0.001$ ) indicate asymmetry and therefore small study effect is likely to be present. Each dot represents a comparison. The y-axis is the standard error of the effect estimate. Larger studies with higher power are placed towards the top and lower powered studies are placed towards the bottom. The x-axis shows the result for the studies expressed in weighted mean difference.

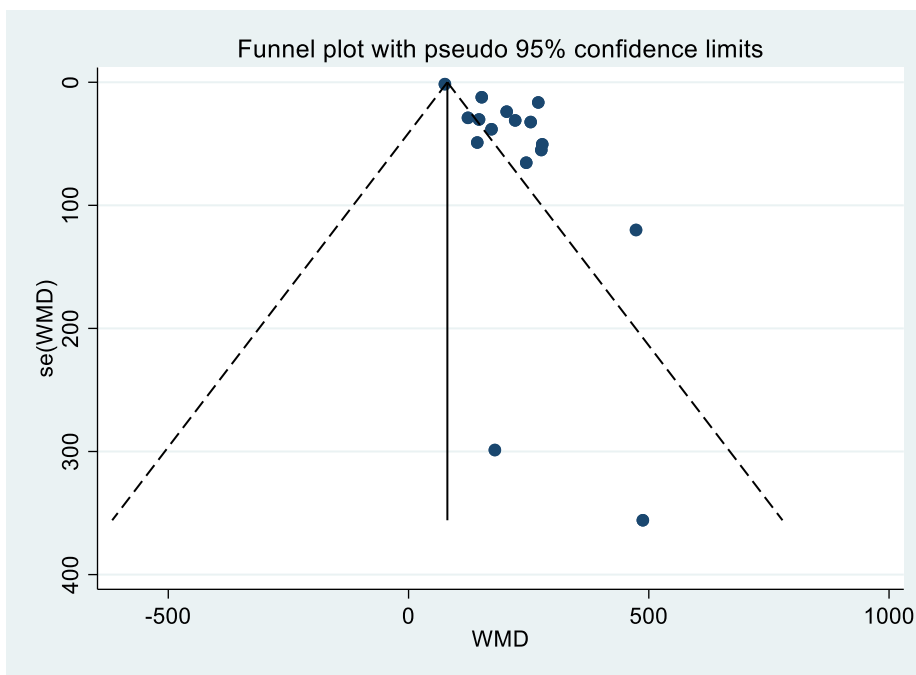

**Supplementary Figure 17:** Funnel plot of the studies reporting on mortality among all COVID-19 patients and baseline lactate dehydrogenase. The visual assessment of the funnel plot and the Egger's test ( $p < 0.001$ ) indicate asymmetry and therefore small study effect is likely to be present. Each dot represents a comparison. The y-axis is the standard error of the effect estimate. Larger studies with higher power are placed towards the top and lower powered studies are placed towards the bottom. The x-axis shows the result for the studies expressed in weighted mean difference.

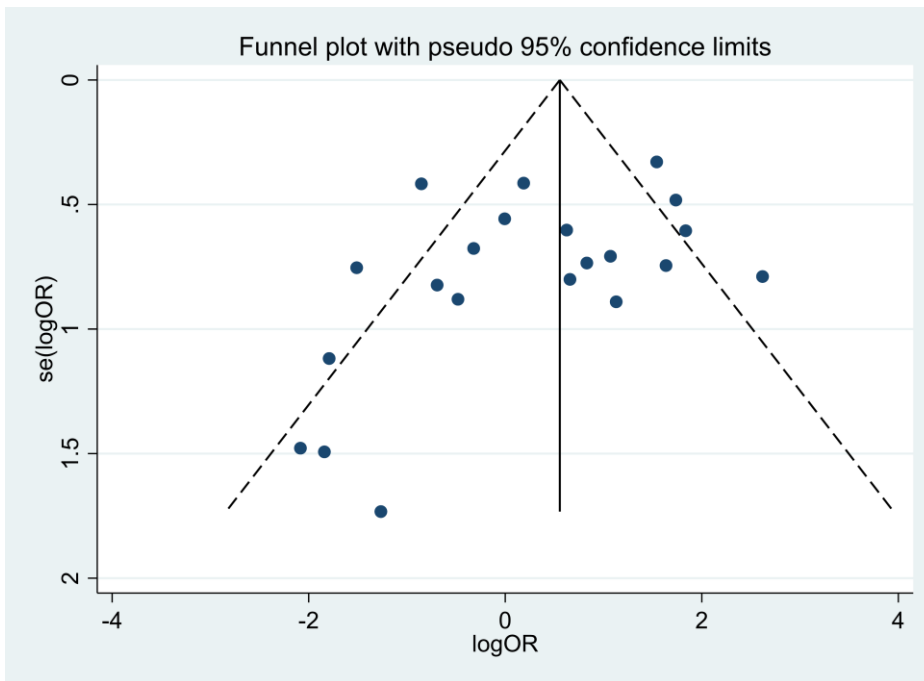

**Supplementary Figure 18:** Funnel plot of the studies reporting on intensive care requirement and baseline total white blood cell count. The visual assessment of the funnel plot and the Egger's test ( $p=0.124$ ) did not indicate asymmetry and therefore small study effect is not likely to be present. Each dot represents a comparison. The y-axis is the standard error of the effect estimate. Larger studies with higher power are placed towards the top and lower powered studies are placed towards the bottom. The x-axis shows the result for the studies expressed in odds ratio.

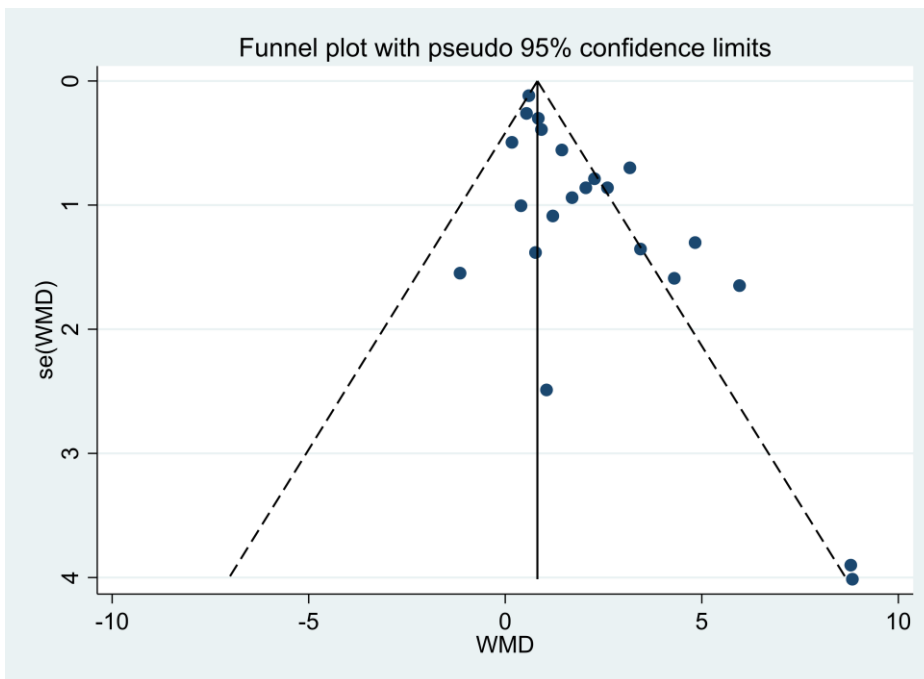

**Supplementary Figure 19:** Funnel plot of the studies reporting on mortality among all COVID-19 patients and baseline total white blood cell count. The visual assessment of the funnel plot and the Egger's test ( $p<0.001$ ) indicate asymmetry and therefore small study effect is likely to be present. Each dot represents a comparison. The y-axis is the standard error of the effect estimate. Larger studies with higher power are placed towards the top and lower powered studies are placed towards the bottom. The x-axis shows the result for the studies expressed in weighted mean difference.

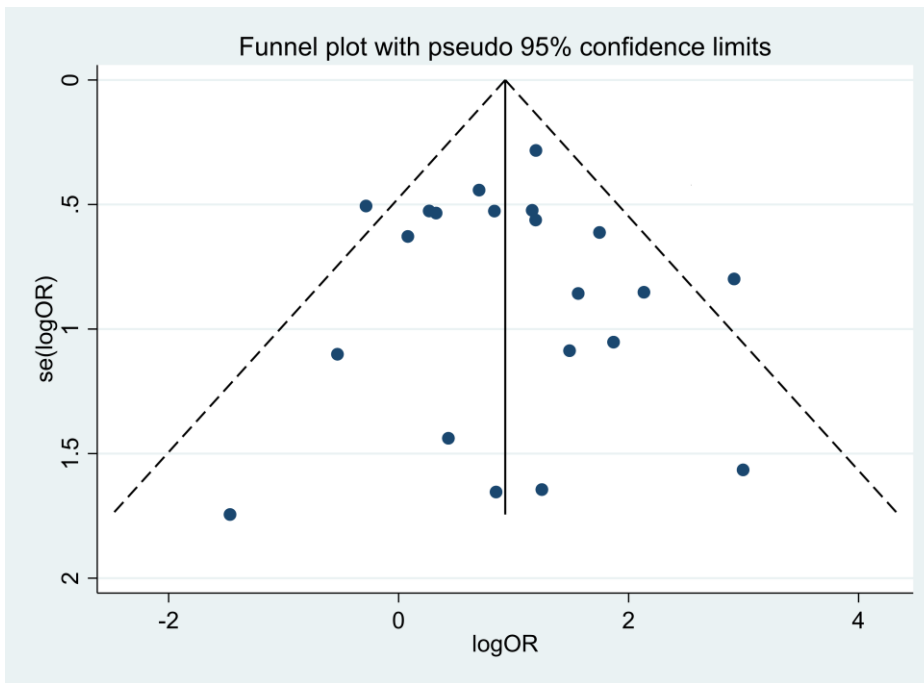

**Supplementary Figure 20:** Funnel plot of the studies reporting on intensive care requirement and baseline absolute lymphocyte count. The visual assessment of the funnel plot and the Egger's test ( $p=0.738$ ) did not indicate asymmetry and therefore small study effect is not likely to be present. Each dot represents a comparison. The y-axis is the standard error of the effect estimate. Larger studies with higher power are placed towards the top and lower powered studies are placed towards the bottom. The x-axis shows the result for the studies expressed in odds ratio.

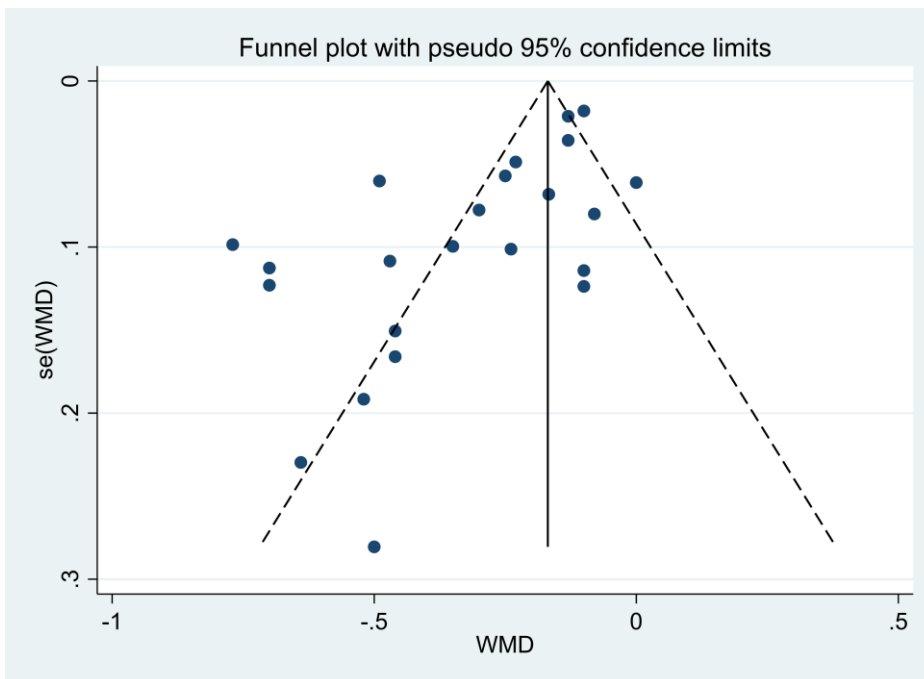

**Supplementary Figure 21:** Funnel plot of the studies reporting on mortality among all COVID-19 patients and baseline absolute lymphocyte count. The visual assessment of the funnel plot and the Egger's test ( $p<0.001$ ) indicate asymmetry and therefore small study effect is likely to be present. Each dot represents a comparison. The y-axis is the standard error of the effect estimate. Larger studies with higher power are placed towards the top and lower powered studies are placed towards the bottom. The x-axis shows the result for the studies expressed in weighted mean difference.

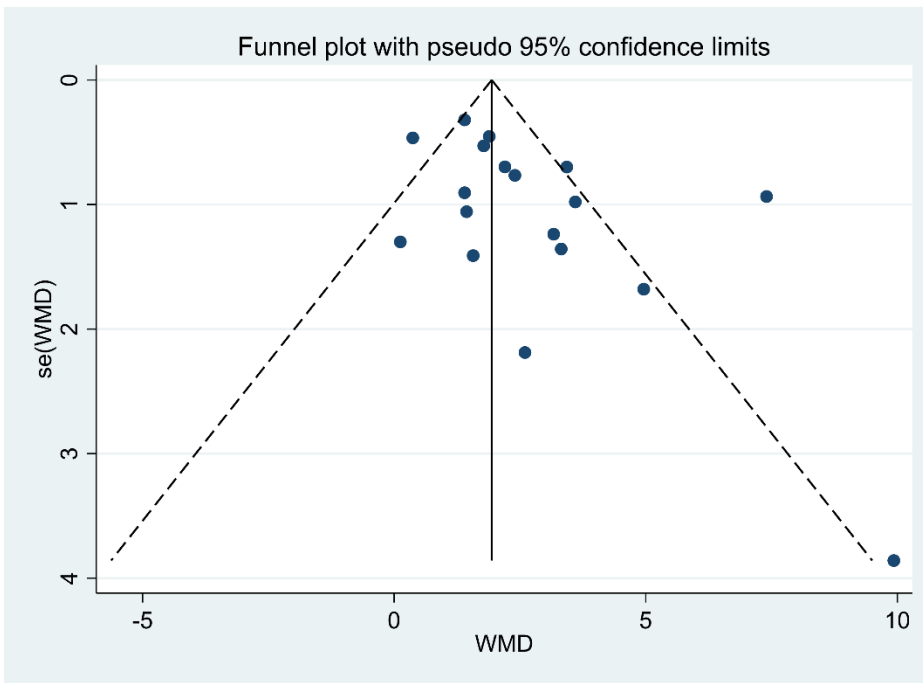

**Supplementary Figure 22:** Funnel plot of the studies reporting on intensive care requirement and baseline absolute neutrophil count. The visual assessment of the funnel plot and the Egger's test ( $p=0.037$ ) indicate asymmetry and therefore small study effect is likely to be present. Each dot represents a comparison. The y-axis is the standard error of the effect estimate. Larger studies with higher power are placed towards the top and lower powered studies are placed towards the bottom. The x-axis shows the result for the studies expressed in weighted mean difference .

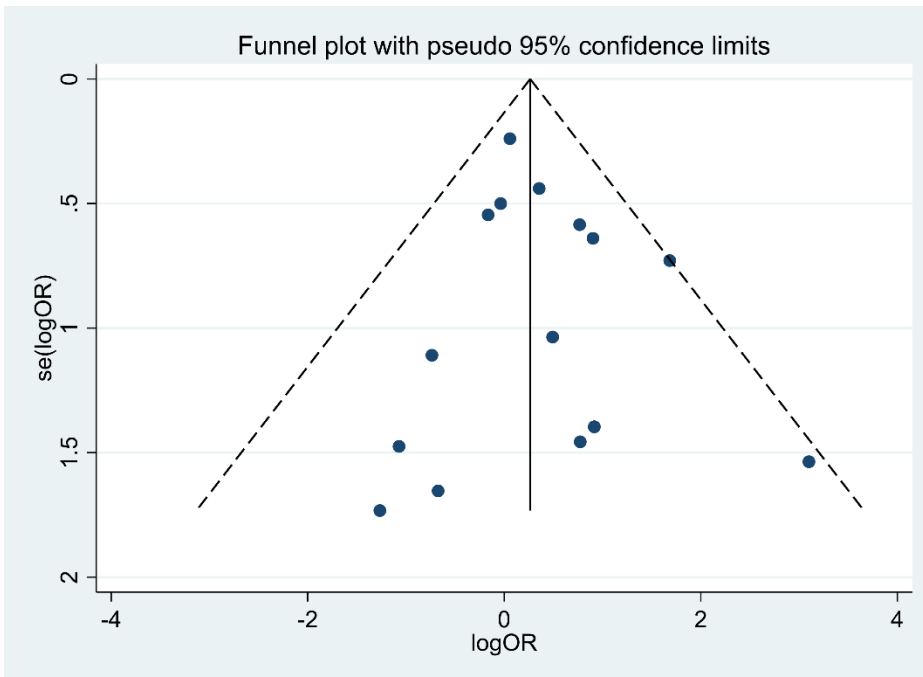

**Supplementary Figure 23:** Funnel plot of the studies reporting on mortality among all COVID-19 patients and platelet count. The visual assessment of the funnel plot and the Egger's test ( $p=0.410$ ) did not indicate asymmetry and therefore small study effect is not likely to be present. Each dot represents a comparison. The y-axis is the standard error of the effect estimate. Larger studies with higher power are placed towards the top and lower powered studies are placed towards the bottom. The x-axis shows the result for the studies expressed in odds ratios.



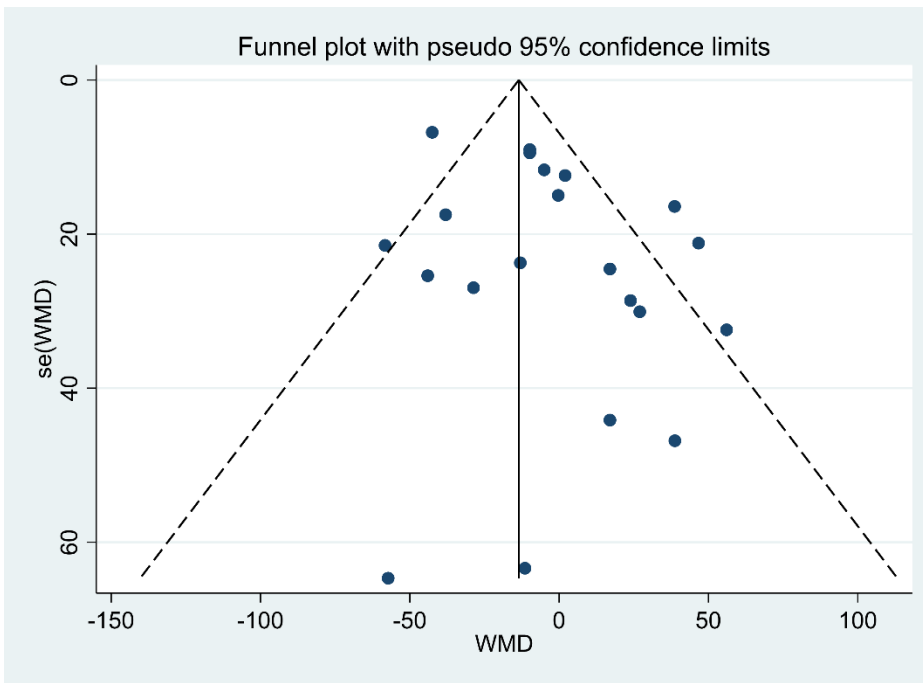

**Supplementary Figure 24:** Funnel plot of the studies reporting on intensive care requirement and baseline absolute platelet count. The visual assessment of the funnel plot and the Egger's test ( $p=0.075$ ) indicate asymmetry and therefore small study effect is likely to be present. Each dot represents a comparison. The y-axis is the standard error of the effect estimate. Larger studies with higher power are placed towards the top and lower powered studies are placed towards the bottom. The x-axis shows the result for the studies expressed in weighted mean difference.

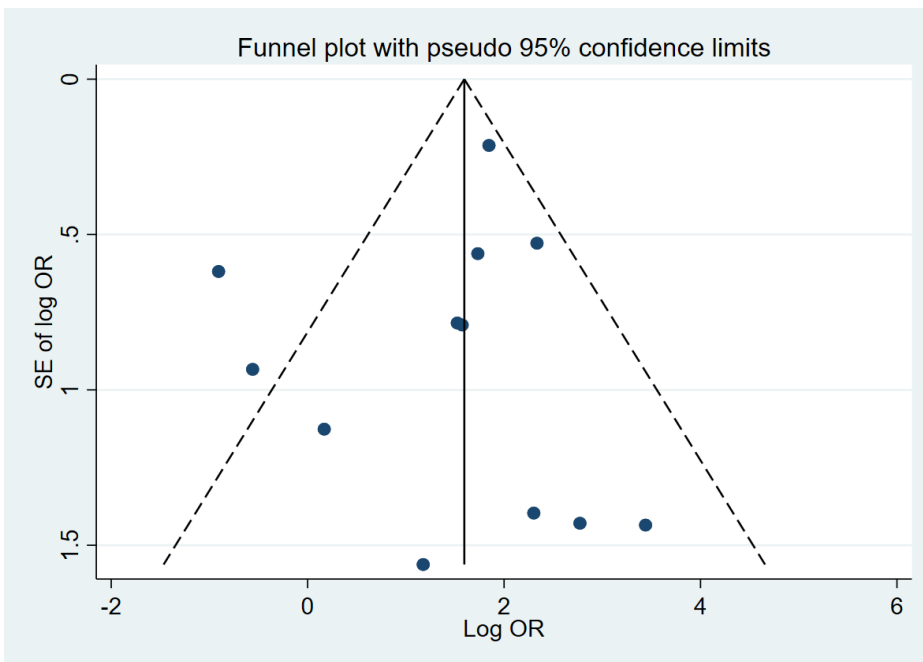

**Supplementary Figure 25:** Funnel plot of the studies reporting on mortality among all COVID-19 patients and baseline C-reactive protein. The visual assessment of the funnel plot and the Egger's test ( $p=0.474$ ) did not indicate asymmetry and therefore small study effect is not likely to be present. Each dot represents a comparison. The y-axis is the standard error of the effect estimate. Larger studies with higher power are placed towards the top and lower powered studies are placed towards the bottom. The x-axis shows the result for the studies expressed in odds ratios.

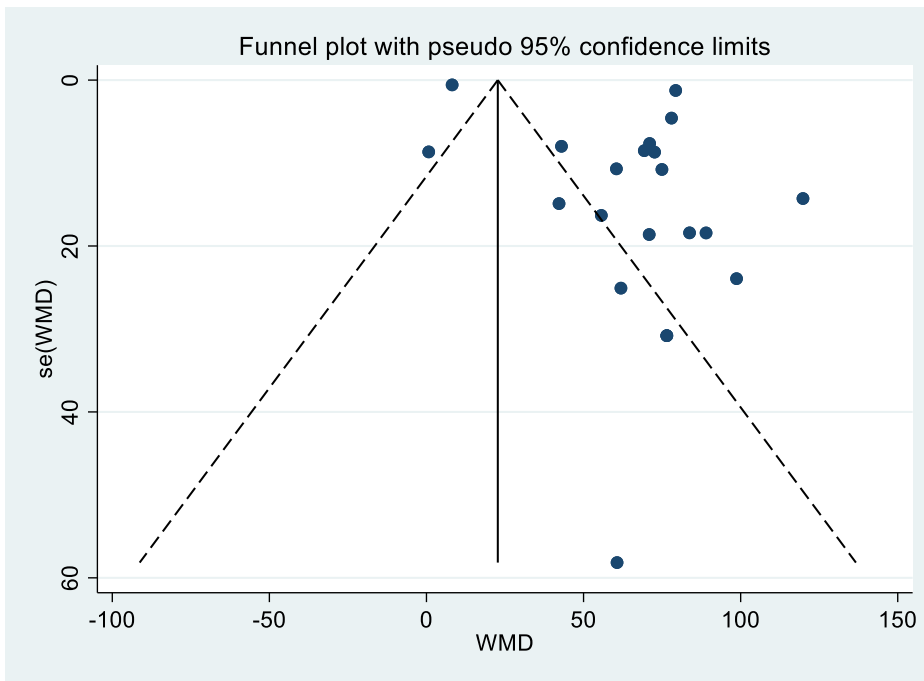

**Supplementary Figure 26:** Funnel plot of the studies reporting on instensive care requirement and baseline C-reactive protein. The visual assessment of the funnel plot and the Egger's test ( $p=0.059$ ) indicate asymmetry and therefore small study effect is likely to be present. Each dot represents a comparison. The y-axis is the standard error of the effect estimate. Larger studies with higher power are placed towards the top and lower powered studies are placed towards the bottom. The x-axis shows the result for the studies expressed in weighted mean difference .

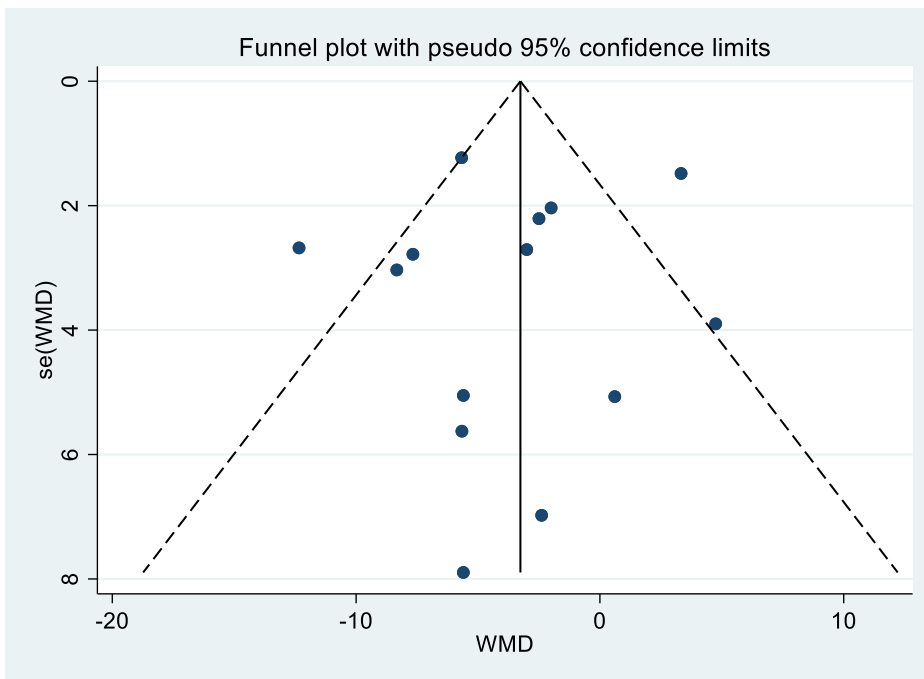

**Supplementary Figure 27:** Funnel plot of the studies reporting on instensive care requirement and baseline heamoglobin. The visual assessment of the funnel plot and the Egger's test ( $p=0.230$ ) did indicate asymmetry and therefore small study effect is not likely to be present. Each dot represents a comparison. The y-axis is the standard error of the effect estimate. Larger studies with higher power are placed towards the top and lower powered studies are placed towards the bottom. The x-axis shows the result for the studies expressed in weighted mean difference .

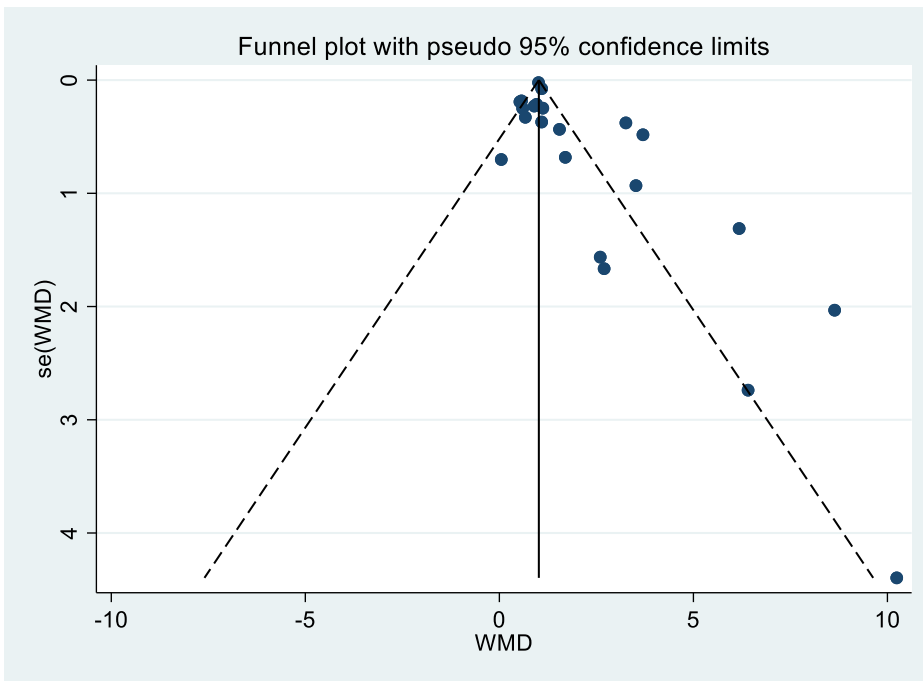

**Supplementary Figure 28:** Funnel plot of the studies reporting on intensive care requirement and baseline D-Dimer. The visual assessment of the funnel plot and the Egger's test ( $p=0.007$ ) indicate asymmetry and therefore small study effect is likely to be present. Each dot represents a comparison. The y-axis is the standard error of the effect estimate. Larger studies with higher power are placed towards the top and lower powered studies are placed towards the bottom. The x-axis shows the result for the studies expressed in weighted mean difference .

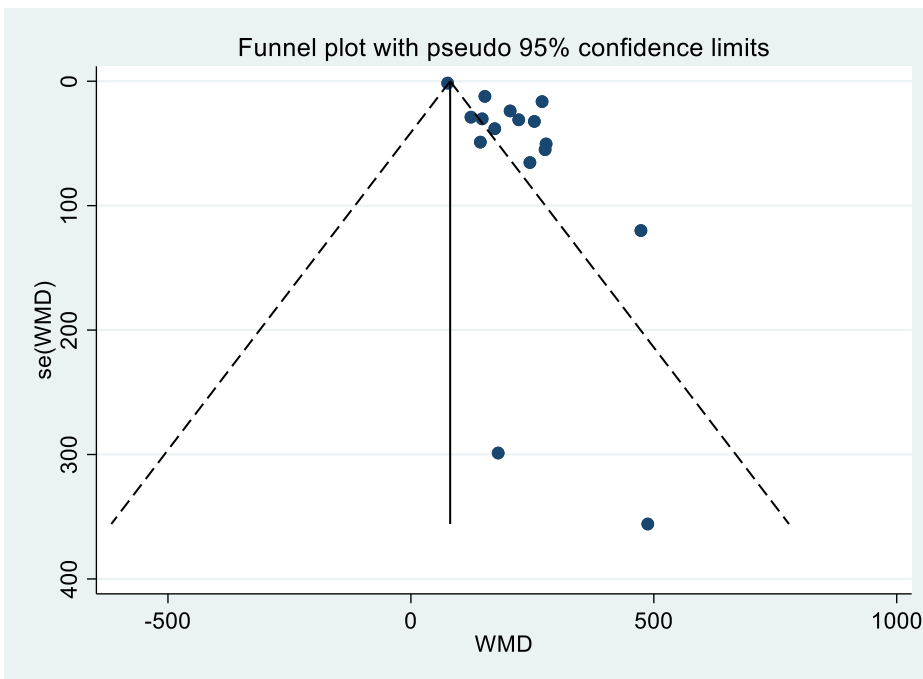

**Supplementary Figure 29:** Funnel plot of the studies reporting on intensive care requirement and baseline lactate dehydrogenase. The visual assessment of the funnel plot and the Egger's test ( $p=0.141$ ) did indicate asymmetry and therefore small study effect is not likely to be present. Each dot represents a comparison. The y-axis is the standard error of the effect estimate. Larger studies with higher power are placed towards the top and lower powered studies are placed towards the bottom. The x-axis shows the result for the studies expressed in weighted mean difference.

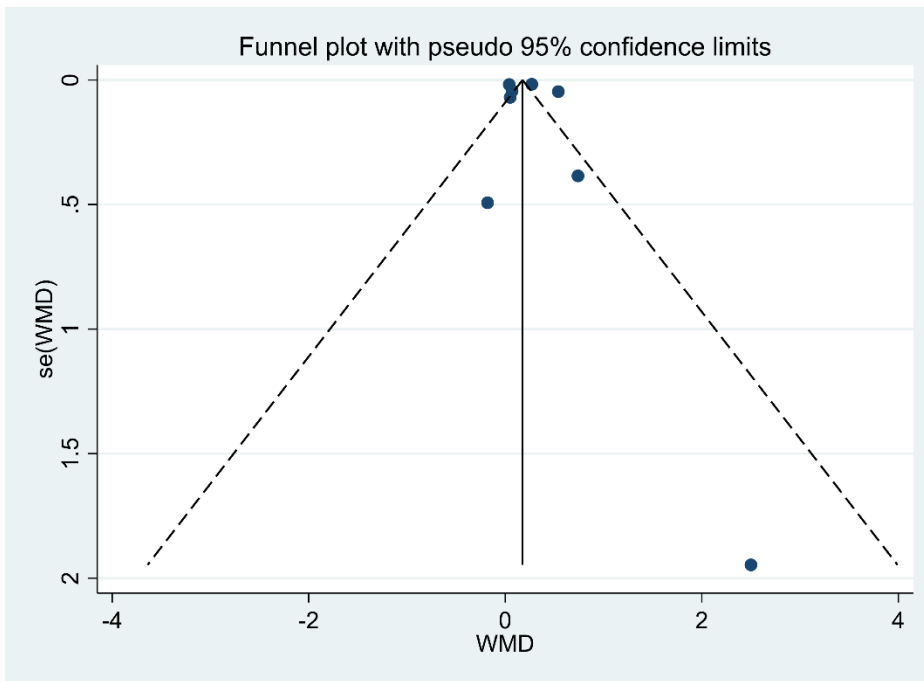

**Supplementary Figure 30:** Funnel plot of the studies reporting on intensive care requirement and baseline procalcitonin. The visual assessment of the funnel plot and the Egger's test ( $p=0.735$ ) did not indicate asymmetry and therefore small study effect is not likely to be present. Each dot represents a comparison. The y-axis is the standard error of the effect estimate. Larger studies with higher power are placed towards the top and lower powered studies are placed towards the bottom. The x-axis shows the result for the studies expressed in weighted mean difference.

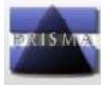

# PRISMA 2009 Checklist

| Section/topic                      | #  | Checklist item                                                                                                                                                                                                                                                                                              | Reported on page # |
|------------------------------------|----|-------------------------------------------------------------------------------------------------------------------------------------------------------------------------------------------------------------------------------------------------------------------------------------------------------------|--------------------|
| <b>TITLE</b>                       |    |                                                                                                                                                                                                                                                                                                             |                    |
| Title                              | 1  | Identify the report as a systematic review, meta-analysis, or both.                                                                                                                                                                                                                                         | Page 1             |
| <b>ABSTRACT</b>                    |    |                                                                                                                                                                                                                                                                                                             |                    |
| Structured summary                 | 2  | Provide a structured summary including, as applicable: background; objectives; data sources; study eligibility criteria, participants, and interventions; study appraisal and synthesis methods; results; limitations; conclusions and implications of key findings; systematic review registration number. | Page 2             |
| <b>INTRODUCTION</b>                |    |                                                                                                                                                                                                                                                                                                             |                    |
| Rationale                          | 3  | Describe the rationale for the review in the context of what is already known.                                                                                                                                                                                                                              | Page 4             |
| Objectives                         | 4  | Provide an explicit statement of questions being addressed with reference to participants, interventions, comparisons, outcomes, and study design (PICOS).                                                                                                                                                  | Page 4             |
| <b>METHODS</b>                     |    |                                                                                                                                                                                                                                                                                                             |                    |
| Protocol and registration          | 5  | Indicate if a review protocol exists, if and where it can be accessed (e.g., Web address), and, if available, provide registration information including registration number.                                                                                                                               | Page 4             |
| Eligibility criteria               | 6  | Specify study characteristics (e.g., PICOS, length of follow-up) and report characteristics (e.g., years considered, language, publication status) used as criteria for eligibility, giving rationale.                                                                                                      | Page 4–5           |
| Information sources                | 7  | Describe all information sources (e.g., databases with dates of coverage, contact with study authors to identify additional studies) in the search and date last searched.                                                                                                                                  | Page 4             |
| Search                             | 8  | Present full electronic search strategy for at least one database, including any limits used, such that it could be repeated.                                                                                                                                                                               | Page 4             |
| Study selection                    | 9  | State the process for selecting studies (i.e., screening, eligibility, included in systematic review, and, if applicable, included in the meta-analysis).                                                                                                                                                   | Page 4             |
| Data collection process            | 10 | Describe method of data extraction from reports (e.g., piloted forms, independently, in duplicate) and any processes for obtaining and confirming data from investigators.                                                                                                                                  | Page 5             |
| Data items                         | 11 | List and define all variables for which data were sought (e.g., PICOS, funding sources) and any assumptions and simplifications made.                                                                                                                                                                       | Page 5             |
| Risk of bias in individual studies | 12 | Describe methods used for assessing risk of bias of individual studies (including specification of whether this was done at the study or outcome level), and how this information is to be used in any data synthesis.                                                                                      | Page 5             |
| Summary measures                   | 13 | State the principal summary measures (e.g., risk ratio, difference in means).                                                                                                                                                                                                                               | Page 5             |
| Synthesis of results               | 14 | Describe the methods of handling data and combining results of studies, if done, including measures of consistency (e.g., $I^2$ ) for each meta-analysis.                                                                                                                                                   | Page 5             |



# PRISMA 2009 Checklist

| Section/topic                 | #  | Checklist item                                                                                                                                                                                           | Reported on page #           |
|-------------------------------|----|----------------------------------------------------------------------------------------------------------------------------------------------------------------------------------------------------------|------------------------------|
| Risk of bias across studies   | 15 | Specify any assessment of risk of bias that may affect the cumulative evidence (e.g., publication bias, selective reporting within studies).                                                             | Page 5                       |
| Additional analyses           | 16 | Describe methods of additional analyses (e.g., sensitivity or subgroup analyses, meta-regression), if done, indicating which were pre-specified.                                                         | Not applicable               |
| <b>RESULTS</b>                |    |                                                                                                                                                                                                          |                              |
| Study selection               | 17 | Give numbers of studies screened, assessed for eligibility, and included in the review, with reasons for exclusions at each stage, ideally with a flow diagram.                                          | Page 5<br>Figure 1           |
| Study characteristics         | 18 | For each study, present characteristics for which data were extracted (e.g., study size, PICOS, follow-up period) and provide the citations.                                                             | Suppl. Table 1               |
| Risk of bias within studies   | 19 | Present data on risk of bias of each study and, if available, any outcome level assessment (see item 12).                                                                                                | Suppl. Figure 1–3            |
| Results of individual studies | 20 | For all outcomes considered (benefits or harms), present, for each study: (a) simple summary data for each intervention group (b) effect estimates and confidence intervals, ideally with a forest plot. | Figure 2-3<br>Suppl. Table 4 |
| Synthesis of results          | 21 | Present results of each meta-analysis done, including confidence intervals and measures of consistency.                                                                                                  | Page 5–7<br>Suppl. Table 2–3 |
| Risk of bias across studies   | 22 | Present results of any assessment of risk of bias across studies (see Item 15).                                                                                                                          | Suppl. Figure 4–30           |
| Additional analysis           | 23 | Give results of additional analyses, if done (e.g., sensitivity or subgroup analyses, meta-regression [see Item 16]).                                                                                    | Not applicable               |
| <b>DISCUSSION</b>             |    |                                                                                                                                                                                                          |                              |
| Summary of evidence           | 24 | Summarize the main findings including the strength of evidence for each main outcome; consider their relevance to key groups (e.g., healthcare providers, users, and policy makers).                     | Page 7–9                     |
| Limitations                   | 25 | Discuss limitations at study and outcome level (e.g., risk of bias), and at review-level (e.g., incomplete retrieval of identified research, reporting bias).                                            | Page 9                       |
| Conclusions                   | 26 | Provide a general interpretation of the results in the context of other evidence, and implications for future research.                                                                                  | Page 9                       |
| <b>FUNDING</b>                |    |                                                                                                                                                                                                          |                              |
| Funding                       | 27 | Describe sources of funding for the systematic review and other support (e.g., supply of data); role of funders for the systematic review.                                                               | Page 1                       |

From: Moher D, Liberati A, Tetzlaff J, Altman DG, The PRISMA Group (2009). Preferred Reporting Items for Systematic Reviews and Meta-Analyses: The PRISMA Statement. PLoS Med 6(7): e1000097. doi:10.1371/journal.pmed1000097

For more information, visit: [www.prisma-statement.org](http://www.prisma-statement.org).

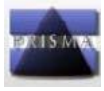

# PRISMA 2009 Checklist
